# Supplementary material for: Impact of prior probabilities of MRSA as an infectious agent on the accuracy of the emerging molecular diagnostic tests: a model simulation
Source: PubMed Central journal article supplement — BMJ Open. 2012 Dec 18;2(6):e001804. doi: 10.1136/bmjopen-2012-001804 (PMC3533025; doi:10.1136/bmjopen-2012-001804), 2012-12-18
Supplement: bmjopen-2012-001804.draft_revisions.pdf [file bmjopen-2012-001804.draft_revisions.pdf]

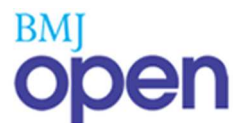

## Molecular diagnostics require a Bayesian approach

|                                 |                                                                                                                                                                                                                                             |
|---------------------------------|---------------------------------------------------------------------------------------------------------------------------------------------------------------------------------------------------------------------------------------------|
| Journal:                        | <i>BMJ Open</i>                                                                                                                                                                                                                             |
| Manuscript ID:                  | bmjopen-2012-001804                                                                                                                                                                                                                         |
| Article Type:                   | Research                                                                                                                                                                                                                                    |
| Date Submitted by the Author:   | 06-Sep-2012                                                                                                                                                                                                                                 |
| Complete List of Authors:       | Zilberberg, Marya; EviMed Research Group, LLC, ; University of Massachusetts, Shorr, Andrew; Washington Hospital Center, Medicine                                                                                                           |
| <b>Primary Subject Heading</b>: | Infectious diseases                                                                                                                                                                                                                         |
| Secondary Subject Heading:      | Epidemiology, Health services research, Evidence based practice, Diagnostics                                                                                                                                                                |
| Keywords:                       | EPIDEMIOLOGY, Organisation of health services < HEALTH SERVICES ADMINISTRATION & MANAGEMENT, Diagnostic microbiology < INFECTIOUS DISEASES, Epidemiology < INFECTIOUS DISEASES, Adult intensive & critical care < INTENSIVE & CRITICAL CARE |
|                                 |                                                                                                                                                                                                                                             |

SCHOLARONE™  
Manuscripts

## Molecular diagnostics require a Bayesian approach

**Marya D. Zilberberg, MD, MPH<sup>\*1,2</sup>**,

<sup>1</sup>EviMed Research Group, LLC, Goshen, MA

<sup>2</sup>University of Massachusetts, Amherst, MA

\*Corresponding author

President & CEO, EviMed Research Group, LLC

Adjunct Associate Professor of Epidemiology, University of Massachusetts School of Public Health and Health Sciences

PO Box 303

Goshen, MA 01032

(413)-268-6381

(413)-268-3416 fax

[evimedgroup@gmail.com](mailto:evimedgroup@gmail.com)

**Andrew F. Shorr, MD, MPH<sup>3</sup>**

<sup>3</sup>Washington Hospital Center, Washington, DC

Associate Section Director, Pulmonary Critical Care, Washington Hospital Center

Associate Professor of Medicine, Georgetown University

110 Irving Street, NW

Washington, DC 20010

(202)-877-2998

(202)-782-9032 fax

[Andrew.Shorr@gmail.com](mailto:Andrew.Shorr@gmail.com)

**Copyright** © 2012 Marya Zilberberg

Dr. Zilberberg, the Corresponding Author, has the right to grant on behalf of all authors and does grant on behalf of all authors, an exclusive license on a worldwide basis to the BMJ Publishing Group Ltd to permit this article (if accepted) to be published in BMJ editions and any other BMJ PGL products and sublicenses such use and exploit all subsidiary rights, as set out in our license.

**Competing interests:** The authors have nothing to disclose. The authors received no funding for this study. All authors have completed the Unified Competing Interest form.

**Guarantor statement:** Dr. Zilberberg has had access to all the data and guarantees its integrity.

**IRB statement:** The study is a model and did not require an Ethics Committee review

**Author contributions:**

Dr. Zilberberg conceived, designed and executed the study, data collection and analyses, drafted the manuscript and revised it for important intellectual content.

Dr. Shorr refined the study idea, design and interpretation, and revised the manuscript for important intellectual content.

**Word count:** 2,562

**References:** 19

**Tables and Figures:** 4

## Abstract

**Objectives.** Traditional microbiology identification takes 48-72 hours to complete. This lag forces clinicians to rely on broad-spectrum empiric coverage. To address this gap, manufacturers are developing rapid molecular diagnostics (RMD). We hypothesized that RMD's accuracy is more dependent upon population risk of harboring the culprit pathogen than to their sensitivity and specificity.

**Design.** A mathematical model

**Setting and Participants.** We used the range of risks (5%-50%) for methicillin-resistant *Staphylococcus aureus* (MRSA) among patients hospitalized with complicated skin and skin structure infections (cSSSI), pneumonia, or sepsis.

**Interventions.** None

**Main outcome measures.** We modeled the impact of changing a test's characteristics on its positive (PPV) and negative (NPV) predictive values, and hence the risk of over- or under-treatment, within strata of an organism's population prevalence. MRSA diagnostics provided assumptions for the test sensitivity and specificity (95%-99%). Scenarios with low sensitivity and specificity (90%), and best- and worst-case scenarios normalized to the annual universe of populations of interest, were examined.

**Results.** With a low prevalence (5%) and high test specificity, the PPV was 84%. Conversely, with 50% prevalence and 95% test specificity the PPV rose to  $\geq 95\%$ . Even when the test's specificity and sensitivity were both 90%, in a high-risk population both PPV and NPV were  $\sim 90\%$ . In the worst-case scenario, 150,000 patients with cSSSI, pneumonia and sepsis annually were at risk for inappropriate treatment, 91% of these at risk for over-treatment. In the best-case scenario, 81% of 18,000 patients at risk for inappropriate coverage were subject to over-treatment.

**Conclusions.** Although promising for limiting exposure to excessive antimicrobial coverage, RMDs alone will not solve the issue of inappropriate, and particularly over-, treatment. Increasing pre-test probability as a strategy to minimize antibiotic abuse results in more accurate patient classification than does developing a test with near-perfect characteristics. The healthcare community must build robust evidence and information technology infrastructure to guide appropriate use of such testing.

## Article summary

### *Article focus*

- Traditional microbiology identification takes 48-72 hours to complete, which forces clinicians to rely on broad-spectrum empiric coverage.
- To address this gap, manufacturers are developing rapid molecular diagnostics (RMD).
- It is unclear what impact RMDs may have in different population on overdiagnosis and overtreatment

### *Key messages*

- Although promising for limiting exposure to excessive antimicrobial coverage, RMDs alone will not solve the issue of inappropriate, and particularly over-, treatment.
- Increasing pre-test probability as a strategy to minimize antibiotic abuse results in more accurate patient classification than does developing a test with near-perfect sensitivity and specificity.

### *Strengths and limitations*

- As a mathematical model, our study relies on the accuracy of estimates in the literature, which predisposes our computations to greater uncertainty.
- The model is transparent
- Our findings span a wide range of plausible epidemiology.
- The data underscore the need to understand local pathogen patterns, the recognition of which should drive decisions about the utility of these powerful molecular diagnostics.

## Introduction

Despite the fact that antibiotics represent a relatively recent advance in medicine, antibiotic resistant bacteria are now common in both the hospital and the community. Antibiotic misuse and abuse represent a key driver of the increasing prevalence in antibiotic resistance (1, 2). The spread of antimicrobial resistance has similarly created a vicious cycle where clinicians repeatedly reach for extended spectrum agents in order to address the current patterns of resistance while potentially worsening them for the future. Underlying this practice approach has been the general unavailability of reliable, rapid diagnostics to help establish the etiology of an infection. Indeed, traditional phenotypic microbiology methods take 48 to 72 hours to identify an organism when present and to determine the antibiotic susceptibility profile. Without a prompt means for either including or excluding potentially resistant pathogens, clinicians frequently have no alternative but to rely on broad-spectrum options for empiric therapy. Such approach is currently warranted, given the extensive data documenting that delayed and inappropriate antibiotic treatment increases the risk for mortality and prolongs the duration of hospitalization (3-9). However, rapid and accurate diagnosis should diminish the uncertainty and help target the culprit organisms without straying into the extremes of overly narrow or overly broad coverage.

To fill this diagnostic gap, several manufacturers are engaged in developing rapid diagnostic modalities that incorporate recent advances in molecular techniques relying on genotyping the organisms. Indeed, some of these technologies are able to arrive at the microbiologic diagnosis in as little as 2 hours, a critical period for tailoring treatment

1  
2  
3 (10). Such improvement in shortening the diagnostic time is invaluable, particularly  
4  
5 given these tests' ostensible accuracy.  
6  
7

8 At the same time, one must exercise caution because these tests are not 100%  
9 accurate. And while manufacturers strive for ever-increasing sensitivity and specificity  
10 for their tests, a more fruitful area of investigation may be learning to identify  
11 characteristics of specific populations in whom these tests may prove to be most helpful  
12 for targeting and tailoring treatment. In other words, the central clinical question may  
13 revolve not around issues of sensitivity and specificity intrinsic to the test, but rather  
14 around the positive (PPV) and negative (NPV) predictive values associated with these  
15 newer tools in populations with various levels of risk for the organisms in question.  
16  
17 Irrespective of the sensitivity and specificity, if the PPV and NPV are not sufficiently  
18 high, then these new tests may not help clinicians either to withhold unnecessarily broad  
19 coverage or to tailor it shortly after the results return.  
20  
21  
22  
23  
24  
25  
26  
27  
28  
29  
30  
31  
32  
33

34 We hypothesized that even under conditions where such rapid diagnostic tests had  
35 near-perfect sensitivity and specificity, the population-specific risk for having a particular  
36 organism would represent a crucial consideration in driving diagnostic accuracy. That is  
37 failure to consider the pre-test probability of these organisms in the population screened  
38 would undermine the potential value of rapid diagnostic tests. To address this question  
39 we developed a model simulation evaluating the application of these assays, and relied  
40 upon publicly available data to populate our analysis.  
41  
42  
43  
44  
45  
46  
47  
48  
49

## 50 **Methods**

51  
52  
53 We developed a mathematical model simulating the impact of changing a test's  
54 characteristics on its accuracy within several strata of population risk for a particular  
55  
56  
57  
58  
59  
60

1  
2  
3 organism. All the inputs were extracted from publicly available data. The primary  
4  
5 outcome of interest was the potential magnitude for over-diagnosis of a particular  
6  
7 pathogen, or the proportion of false positive tests under the varying assumptions. We  
8  
9 were specifically interested in the false positive rates, since these cases are the ones most  
10  
11 likely to receive overly broad treatment when it is not indicated. Such overly broad  
12  
13 treatment represents a key clinical endpoint since it exposes the patient and the healthcare  
14  
15 system to adverse consequences individually and as a group. As a secondary endpoint we  
16  
17 examined the overall inaccuracy of the test in various scenarios, defined as the sum of the  
18  
19 false positive and false negative results as a proportion of the total population.  
20  
21  
22  
23

24  
25 The model was based on the approximate risks of methicillin-resistant  
26  
27 *Staphylococcus aureus* (MRSA) among three distinct hospitalized populations: 1)  
28  
29 complicated skin and skin structure infections (cSSSI) (11-13), 2) pneumonia (11, 14),  
30  
31 and 3) sepsis (11). We sought the most generalizable estimates for at least two factors out  
32  
33 of the following three, using the available data to calculate the third when necessary: 1)  
34  
35 total volume of hospitalizations for each of the diseases of interest, 2) proportion of the  
36  
37 total volume represented by MRSA, and 3) total number of MRSA infections in each  
38  
39 disease category (11, 14, 15).  
40  
41  
42

43  
44 For consistency, the assumptions for the corresponding test characteristics  
45  
46 mimicked those from MRSA diagnostics (16). To derive estimates for positive (PPV) and  
47  
48 negative predictive value (NPV) for a plausible range of test characteristics, we  
49  
50 developed four hypothetical testing situations: 1) Test A, with the sensitivity and  
51  
52 specificity of 95%, 2) Test B, with the sensitivity 99% and specificity 95%, 3) Test C,  
53  
54 with the sensitivity 95% and specificity 99%, and 4) Test D, with the sensitivity and  
55  
56  
57  
58  
59  
60

1  
2  
3 specificity 99%. To explore how deviations from the average sensitivity and specificity  
4 metrics may impact the accuracy of identification, we conducted sensitivity analyses  
5  
6 assuming 90% sensitivity and specificity. Based on the range of MRSA risk estimates in  
7  
8 the populations of interest (i.e., cSSSI, pneumonia, and sepsis), we varied the prevalence  
9  
10 estimates from 5% to 50%, and calculated the PPV and NPV for each of the intermediate  
11  
12 values.  
13  
14  
15

16  
17 We additionally performed best- and worst-case scenario simulations for each of  
18  
19 the populations in question. Thus, for the worst-case scenario where all variables were  
20  
21 biased against the novel rapid diagnostic assay, we utilized as inputs the highest disease  
22  
23 volume and lowest disease prevalence, along with the lowest test sensitivity and  
24  
25 specificity values. Skewing the inputs in this fashion provides a potential estimate of the  
26  
27 extent and impact of misclassification when all assumptions are shifted so as to constrain  
28  
29 the potential value of the rapid diagnostic test in question. Conversely, for the best-case  
30  
31 scenario, we input the lowest disease volume and the highest disease prevalence, along  
32  
33 with the highest test sensitivity and test specificity. For both of these analyses, the total  
34  
35 annual universe of specific disease hospitalizations in the US was used. We utilized these  
36  
37 values to estimate the total numbers of potential cases within each population that would  
38  
39 be over-treated (i.e., treated for MRSA when no MRSA is present), under-treated (i.e.,  
40  
41 not treated for MRSA when MRSA is present) and treated inappropriately (i.e., either  
42  
43 over- or undertreated).  
44  
45  
46  
47  
48  
49

50 Both the values for sensitivity and specificity and disease risk were rounded in  
51  
52 order to ease computational presentation. Volumes and prevalence of MRSA in the  
53  
54 disease states of interest were extracted from several large surveys available in the public  
55  
56  
57  
58  
59  
60



1  
2  
3 domain (Table 1). Thus, for the MRSA cSSSI volumes we relied on a study by Klein,  
4 which quantified these hospitalizations in 2005 (11). The proportions of cSSSI in which  
5 MRSA is the offending pathogen derived from two recent epidemiologic studies of cSSSI  
6 hospitalizations in the US (12, 13). The volume of pneumonia hospitalizations was  
7 extracted from the American Lung Association's 2010 data, and the proportion  
8 represented by MRSA from a large and representative database analysis by Kollef and  
9 colleagues (14, 15). Finally, we relied on the Agency's for Healthcare Research and  
10 Quality recent statistical brief quantifying the burden of hospitalizations with sepsis,  
11 while the Klein study provided the proportion likely caused by MRSA (11, 16).  
12  
13  
14  
15  
16  
17  
18  
19  
20  
21  
22  
23  
24

## 25 Results

26  
27 The input assumptions and their sources are presented in Table 1. The estimated  
28 prevalence of MRSA ranges from approximately 5% in sepsis to nearly 50% in cSSSI,  
29 while the prevalence of MRSA in pneumonia falls between those extremes. Under the  
30 conditions of lowest prevalence (5%) along with the average test specificity of 95%, the  
31 PPV reaches only 50% (Figure 1). Improving the specificity by nearly 5% to 99%  
32 without altering the disease prevalence results in a moderate improvement in the PPV to  
33 approximately 84%. Alternatively, a change of a similar magnitude in the PPV occurs,  
34 when the prevalence of disease increases from 5% to the 10%-20% range, even as the  
35 specificity remains anchored at 95% (Figure 1). The PPV further improves as the  
36 prevalence of disease approaches 50%. Notably, at the extremes of disease prevalence  
37 and test specificity, the relative improvement in test accuracy is numerically greater when  
38 the prevalence is increased while holding the specificity constant (PPV 95.0% and NPV  
39 95.2% for Tests A and B, prevalence 50%) as compared to a scenario where one  
40  
41  
42  
43  
44  
45  
46  
47  
48  
49  
50  
51  
52  
53  
54  
55  
56  
57  
58  
59  
60

1  
2  
3 modulates the test specificity and maintains the prevalence constant (PPV 83.3% and  
4 NPV 83.9% for Tests C and D, prevalence 5%). Put another way, the net change in PPV  
5 is maximized based on moderate changes in disease prevalence as opposed to alterations  
6 in test sensitivity. As for the NPV, a rise in sensitivity from 95% to 99% does not yield  
7 substantial alterations in the value. Essentially, the NPV is already quite high, no matter  
8 what the prevalence of resistance in the population. Conversely, the NPV suffers only  
9 modestly in the populations where disease prevalence is highest compared to those with  
10 the lowest disease prevalence (Figure 1).  
11  
12  
13  
14  
15  
16  
17  
18  
19  
20  
21

22 The sensitivity analysis in which we assume that both the sensitivity and  
23 specificity of the test equal 90% is illustrated in Figure 2. At the lowest prevalence of  
24 disease, this specificity affords an unacceptably low PPV (32.1%), while the NPV  
25 remains high, exceeding 99%. As the prevalence of the disease rises in the target  
26 population, while the test's specificity and sensitivity remain fixed at 90%, the PPV and  
27 NPV converge at 90%, indicating a major improvement in the PPV without dramatically  
28 compromising the NPV.  
29  
30  
31  
32  
33  
34  
35  
36  
37  
38

39 Best- and worst-case scenario estimates of the total annual pool of patients at risk  
40 for MRSA infection in cSSSI, pneumonia and sepsis demonstrate that the potential for  
41 over-treatment far exceeds that for under-treatment (Table 2). Focusing on sepsis as an  
42 example, for the worst-case calculation we assumed 1,141,000 sepsis hospitalizations  
43 annually, a 5% MRSA prevalence, along with test characteristics of 95% sensitivity and  
44 95% specificity. These parameters resulted in 57,050 potential cases of inappropriate  
45 treatment reflecting the sum of subjects classified as falsely positive or negative. Of  
46 these misclassified subjects, 54,198 (95%) represent those at risk for over-treatment.  
47  
48  
49  
50  
51  
52  
53  
54  
55  
56  
57  
58  
59  
60

1  
2  
3  
4  
5  
6  
7  
8  
9  
10  
11  
12  
13  
14  
15  
16  
17  
18  
19  
20  
21  
22  
23  
24  
25  
26  
27  
28  
29  
30  
31  
32  
33  
34  
35  
36  
37  
38  
39  
40  
41  
42  
43  
44  
45  
46  
47  
48  
49  
50  
51  
52  
53  
54  
55  
56  
57  
58  
59  
60

Conversely, under the best-case assumptions of a high MRSA prevalence (10%) in sepsis (n=727,000), and a test with near-perfect sensitivity and specificity (both 99%), only 7,270 individuals are at risk for inappropriate treatment with 6,543 (90%) being over-treated (Table 2).

Overall, under the worst-case assumptions for all three of the conditions of interest, over 150,000 patients annually with these three conditions may be treated inappropriately, with overtreatment accounting for 136,000 (91%) of this cohort. Under the best circumstances, among the more than 18,000 patients treated potentially inappropriately, nearly 15,000 (81%) may be subjected to over-treatment (Table 2).

## Discussion

We have demonstrated explicitly that organism prevalence is an important driver of the accuracy of rapid molecular diagnostic tests even when their sensitivity and specificity are near perfect. Additionally, we have shown that although improving the theoretical test's specificity results in greater accuracy, one enhances accuracy even more by restricting test utilization to a population at an increased risk for infection with the pathogen in question. In other words, increasing pre-test probability as a strategy to minimize antibiotic abuse results in more accurate patient classification than does developing a marginally superior rapid diagnostic test with near-perfect specificity. Finally, although promising for limiting exposure to excessive antimicrobial coverage, molecular diagnostics are still likely to result in a substantial amount of inappropriate treatment. The vast majority (over 90%) of such inappropriate coverage is due to over-treatment in scenarios where the test is applied irrespective of considerations of the prevalence of a resistant pathogen.

1  
2  
3 Our data have several important implications. First, as manufacturers, regulators  
4 and clinicians consider what tests may have superior characteristics, it is important for all  
5 stake holders to engage in defining the appropriate populations for testing with these  
6 novel technologies. Our data clearly demonstrate that rather than expending resources for  
7 every laboratory to elevate their sensitivity and specificity to close to 100%, the more  
8 fruitful effort may be to develop algorithms to identify those patient populations at high  
9 risk for the disease being tested. This is particularly true given that marginal  
10 enhancements in sensitivity and specificity often come at the cost of substantial financial  
11 investments. Second, raising the sensitivity of these technologies even beyond the current  
12 levels may be pursuing diminishing returns, given the already high NPV. That is, even  
13 when the sensitivity is no higher than 90%, the negative predictive value reaches very  
14 high levels (over 95%) in the setting of moderate pre-test probability for disease.  
15  
16  
17  
18  
19  
20  
21  
22  
23  
24  
25  
26  
27  
28  
29  
30

31 Third, and possibly most important, by using genotyping as opposed to  
32 phenotyping employed in the traditional microbiology laboratory methods, molecular  
33 diagnostics promise to result in sensitivity values that far exceed those of the traditional  
34 techniques. The flip side of this optimization in sensitivity is a blunting in specificity,  
35 whereby it may become unclear whether the identified organism is indeed the cause of  
36 the clinical condition. Our data indicate that the true need in diagnostic testing lies not in  
37 further optimization of sensitivity, but in improving the specificity of the results.  
38  
39  
40  
41  
42  
43  
44  
45  
46  
47

48 Because improvements in one by necessity lead to detriments in the other, future  
49 directions in molecular diagnostics require thoughtful planning. We have clearly shown  
50 that, in order to live up to the promise of improved targeting of antibiotic treatment, such  
51 planning must include careful consideration of the populations in whom molecular  
52  
53  
54  
55  
56  
57  
58  
59  
60

1  
2  
3 diagnostic techniques are appropriate. In fact the most important lesson from our  
4  
5 simulation is that we need to develop algorithms to help identify patients belonging to  
6  
7 populations with a high risk for the particular pathogen. If a predictive algorithm is able  
8  
9 to enrich the population to be tested to the disease prevalence between 30% and 40%,  
10  
11 both PPV and NPV will be moved into a useful range even when the test's sensitivity and  
12  
13 specificity are both well below 100%. With the advent of health informatics and the  
14  
15 massive growth in computing ability, turning reams of patient data into predictive  
16  
17 equations is a clearly needed functionality. Already several computing systems are  
18  
19 addressing this need, and the trend should continue with the input from all stakeholders  
20  
21 (18, 19).  
22  
23  
24  
25  
26

27 Our study has a number of limitations. The most important limitation is that it is  
28  
29 merely a mathematical model, and, as such, by necessity relies on the accuracy of  
30  
31 estimates in the literature. The fact that some of the papers we used for deriving our  
32  
33 assumptions themselves were modeling exercises (11), predisposes our computations to  
34  
35 greater uncertainty. This, however, does not negate our findings that span a wide range of  
36  
37 plausible epidemiology. Furthermore, our model underscores the need to understand local  
38  
39 pathogen patterns, the recognition of which should drive decisions about the utility of  
40  
41 these powerful molecular diagnostics.  
42  
43  
44  
45

46 In summary, molecular diagnostics promise to streamline identification and  
47  
48 treatment of many infectious diseases. While the emergence of these powerful  
49  
50 technologies is a positive development, we need to attend to developing algorithms to aid  
51  
52 in selecting appropriate patients for their use. Indiscriminate application of molecular  
53  
54 diagnostics to all-comers presenting with signs of an infection without consideration for  
55  
56  
57  
58  
59  
60

1  
2  
3 pre-test probability of disease is likely to result in a great deal of antimicrobial  
4  
5 overtreatment. This will then only accelerate the current trajectory of escalating  
6  
7 resistance. In conjunction with developing these important technologies, it is incumbent  
8  
9 upon the healthcare community to build robust evidence and information technology  
10  
11 infrastructure to guide appropriate use of such testing.  
12  
13

14  
15  
16  
17 **Acknowledgements.** No one other than the listed authors participated in the study. Dr.  
18  
19 Zilberberg had full access to all of the data in the study and takes responsibility for the  
20  
21 integrity of the data and the accuracy of the data analysis.  
22  
23

24  
25 Dr. Zilberberg participated in the conception and design of the study, data analysis and  
26  
27 interpretation and drafting and revising of the manuscript for important intellectual  
28  
29 content. Dr. Shorr participated in the conception of the study, data interpretation and  
30  
31 revising of the manuscript for important intellectual content.  
32  
33

34  
35  
36 **Data sharing:**  
37

38  
39 The model and the inputs are quite transparent and mostly can be found in the paper. If  
40  
41 there is a need for further information, we are happy to provide it.  
42  
43  
44  
45  
46  
47  
48  
49  
50  
51  
52  
53  
54  
55  
56  
57  
58  
59  
60

## References

1. Dellit TH, Owens RC, McGowan JE, Jr., Gerding DN, Weinstein RA, Burke JP et al. Infectious Diseases Society of America and the Society for Healthcare Epidemiology of America guidelines for developing an institutional program to enhance antimicrobial stewardship. *Clin Infect Dis* 2007; 44(2):159-177
2. Spellberg B, Guidos R, Gilbert D, Bradley J, Boucher HW, Scheld WM et al. The epidemic of antibiotic-resistant infections: a call to action for the medical community from the Infectious Diseases Society of America. *Clin Infect Dis* 2008; 46(2):155-164
3. Micek ST, Kollef KE, Reichley RM, Roubinian N, Kollef MH. Health care-associated pneumonia and community-acquired pneumonia: a single-center experience. *Antimicrob Agents Chemother* 2007; 51(10):3568-3573
4. Schramm GE, Johnson JA, Doherty JA, Micek ST, Kollef MH. Methicillin-resistant *Staphylococcus aureus* sterile-site infection: The importance of appropriate initial antimicrobial treatment. *Crit Care Med* 2006; 34(8):2069-2074.
5. Ibrahim EH, Sherman G, Ward S, Fraser VJ, Kollef MH. The influence of inadequate antimicrobial treatment of bloodstream infections on patient outcomes in the ICU setting. *Chest* 2000; 118(1):146-155.
6. Alvarez-Lerma F. Modification of empiric antibiotic treatment in patients with pneumonia acquired in the intensive care unit. ICU-Acquired Pneumonia Study Group. *Intensive Care Med* 1996; 22(5):387-394.
7. Iregui M, Ward S, Sherman G, Fraser VJ, Kollef MH. Clinical importance of delays in the initiation of appropriate antibiotic treatment for ventilator-associated pneumonia. *Chest* 2002; 122(1):262-268.
8. Zilberberg MD, Shorr AF, Micek ST, Mody SH, Kollef MH. Antimicrobial therapy escalation and hospital mortality among patients with health-care-associated pneumonia: a single-center experience. *Chest* 2008; 134(5):963-968.
9. Zilberberg MD, Shorr AF, Micek ST, Chen J, Ramsey AM, Hoban AP et al. Hospitalizations with healthcare-associated complicated skin and skin structure infections: impact of inappropriate empiric therapy on outcomes. *J Hosp Med* 2010; 5(9):535-540.
10. Peterson LR, Liesenfeld O, Woods CW et al. Multicenter evaluation of the LightCycler methicillin-resistant *Staphylococcus aureus* (MRSA) advanced test as a rapid method for detection of MRSA in nasal surveillance swabs. *J Clin Microbiol* 2010;48:1661-6

11. Klein E, Smith DL, Laxminarayan R. Hospitalizations and deaths caused by methicillin-resistant *Staphylococcus aureus*, United States, 1999–2005. *Emerg Infect Dis* 2007;13:1840-6
12. Lipsky BA, Weigelt JA, Gupta V, Killian A, Peng MM. Skin, soft tissue, bone, and joint infections in hospitalized patients: epidemiology and microbiological, clinical, and economic outcomes. *Infect Control Hosp Epidemiol* 2007;28:1290-8
13. Jenkins TC, Sabel AL, Sarcone EE, et al. Skin and soft tissue infections requiring hospitalization at an academic medical center: Opportunities for antimicrobial stewardship. *Clin Infect Dis* 2010;51:895-903
14. Kollef MH, Shorr A, Tabak YP, et al. Epidemiology and outcomes of health-care-associated pneumonia: Results from a large US database of culture-positive pneumonia. *Chest* 2005;128:3854-3862
15. American Lung Association. Trends in Pneumonia and Influenza Morbidity and Mortality, 2010. Available at <http://www.lungusa.org/finding-cures/our-research/trend-reports/pi-trend-report.pdf>, accessed January 17, 2012
16. Hall MJ, Williams SN, DeFrances CJ, Golosinskiy A. Inpatient care for septicemia or sepsis: A challenge for patients and hospitals. NCHS data brief, no 62. Hyattsville, MD: National Center for Health Statistics. 2011. Available at <http://www.cdc.gov/nchs/data/databriefs/db62.pdf>, accessed February 1, 2012
17. BD molecular diagnostic solutions. BD GeneOhm Staph SR Assay package insert. Available at [http://www.bd.com/geneohm/english/products/pdfs/staphsr\\_pkginsert.pdf](http://www.bd.com/geneohm/english/products/pdfs/staphsr_pkginsert.pdf), accessed February 15, 2012
18. Pepitone J. IBM's 'Jeopardy' computer lands health care job. *CNNMoney* 2011 Sep 12, available at [http://money.cnn.com/2011/09/12/technology/ibm\\_watson\\_health\\_care/index.htm](http://money.cnn.com/2011/09/12/technology/ibm_watson_health_care/index.htm), accessed February 15, 2012
19. Terry K. Futuristic Clinical Decision Support Tool Catches On. *InformationWeek Healthcare* 2012 Jan 27, available at <http://informationweek.com/news/healthcare/clinical-systems/232500603>, accessed February 15, 2012



**Table 1. Annual hospitalization volumes**

| Infection type | Annual volume                   | MRSA prevalence (%)                     | MRSA volume                  |
|----------------|---------------------------------|-----------------------------------------|------------------------------|
| cSSSI          | 434,227-1,211,863               | 15.3% <sup>12</sup> -42.7 <sup>13</sup> | 185,415 <sup>11</sup>        |
| Pneumonia      | 651,000 <sup>15</sup>           | 5.6%-14.3% <sup>14</sup>                | 36,540 <sup>11</sup> -93,093 |
| Sepsis         | 727,000-1,141,000 <sup>16</sup> | 4.9%-7.7%                               | 56,246 <sup>11</sup>         |

MRSA=methicillin-resistant *Staphylococcus aureus*; cSSSI=complicated skin and skin structure infection

**Table 2. Best- and worst-case scenario simulations for each disease group**

|                            | Over-treated   | Under-treated | Treated inappropriately |
|----------------------------|----------------|---------------|-------------------------|
| <i>Best-case scenario</i>  |                |               |                         |
| cSSSI                      | 2,600          | 1,733         | 4,333                   |
| Pneumonia                  | 5,534          | 977           | 6,510                   |
| Sepsis                     | 6,543          | 727           | 7,270                   |
| <b>Total</b>               | <b>14,676</b>  | <b>3,437</b>  | <b>18,113</b>           |
| <i>Worst-case scenario</i> |                |               |                         |
| cSSSI                      | 51,389         | 9,069         | 60,458                  |
| Pneumonia                  | 30,923         | 1,628         | 32,550                  |
| Sepsis                     | 54,198         | 2,853         | 57,050                  |
| <b>Total</b>               | <b>136,509</b> | <b>13,549</b> | <b>150,058</b>          |

cSSSI=complicated skin and skin structure infection

**Figure 1. Positive and negative predictive values of a test with the given sensitivity and specificity, stratified by population disease prevalence\***

\*Percentages along the X-axis represent disease prevalence strata  
PPV = positive predictive value; NPV = negative predictive value  
Test A: sensitivity = 95%, specificity = 95%; Test B: sensitivity = 99%, specificity = 95%;  
Test C: sensitivity = 95%, specificity = 99%; Test D: sensitivity = 99%, specificity = 99%

For peer review only

1  
2  
3  
4  
5  
6  
7  
8  
9  
10  
11  
12  
13  
14  
15  
16  
17  
18  
19  
20  
21  
22  
23  
24  
25  
26  
27  
28  
29  
30  
31  
32  
33  
34  
35  
36  
37  
38  
39  
40  
41  
42  
43  
44  
45  
46  
47  
48  
49  
50  
51  
52  
53  
54  
55  
56  
57  
58  
59  
60

1  
2  
3 **Figure 2. Sensitivity analysis under the conditions of test sensitivity and specificity**  
4 **equaling 90%**  
5  
6  
7

8 PPV = positive predictive value; NPV = negative predictive value  
9  
10  
11  
12  
13  
14  
15  
16  
17  
18  
19  
20  
21  
22  
23  
24  
25  
26  
27  
28  
29  
30  
31  
32  
33  
34  
35  
36  
37  
38  
39  
40  
41  
42  
43  
44  
45  
46  
47  
48  
49  
50  
51  
52  
53  
54  
55  
56  
57  
58  
59  
60

1  
2  
3  
4  
5  
6  
7  
8  
9  
10  
11  
12  
13  
14  
15  
16  
17  
18  
19  
20  
21  
22  
23  
24  
25  
26  
27  
28  
29  
30  
31  
32  
33  
34  
35  
36  
37  
38  
39  
40  
41  
42  
43  
44  
45  
46  
47  
48  
49  
50  
51  
52  
53  
54  
55  
56  
57  
58  
59  
60

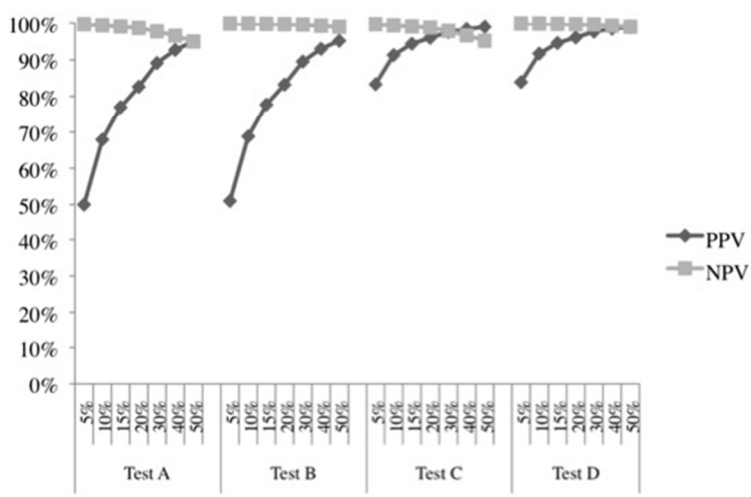

254x190mm (72 x 72 DPI)

Review only

1  
2  
3  
4  
5  
6  
7  
8  
9  
10  
11  
12  
13  
14  
15  
16  
17  
18  
19  
20  
21  
22  
23  
24  
25  
26  
27  
28  
29  
30  
31  
32  
33  
34  
35  
36  
37  
38  
39  
40  
41  
42  
43  
44  
45  
46  
47  
48  
49  
50  
51  
52  
53  
54  
55  
56  
57  
58  
59  
60

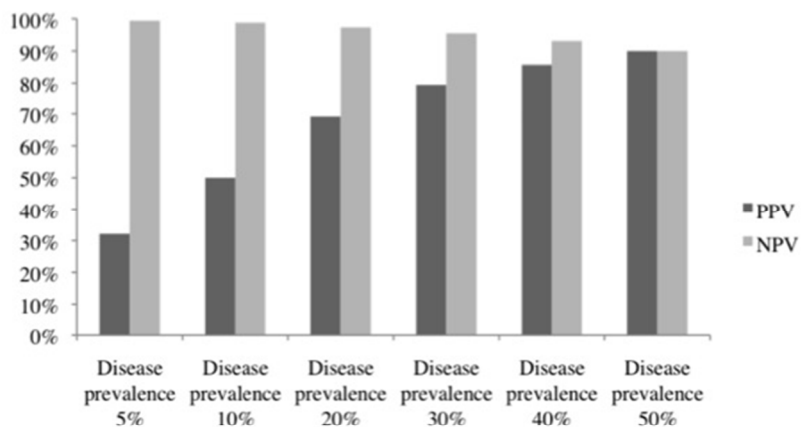

254x190mm (72 x 72 DPI)

Review only

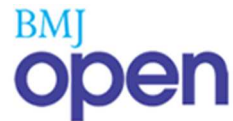

**Impact of prior probabilities of MRSA as an infectious agent  
on the accuracy of the emerging molecular diagnostic tests:  
A model simulation**

|                                 |                                                                                                                                                                                                                                             |
|---------------------------------|---------------------------------------------------------------------------------------------------------------------------------------------------------------------------------------------------------------------------------------------|
| Journal:                        | <i>BMJ Open</i>                                                                                                                                                                                                                             |
| Manuscript ID:                  | bmjopen-2012-001804.R1                                                                                                                                                                                                                      |
| Article Type:                   | Research                                                                                                                                                                                                                                    |
| Date Submitted by the Author:   | 16-Nov-2012                                                                                                                                                                                                                                 |
| Complete List of Authors:       | Zilberberg, Marya; EviMed Research Group, LLC, ; University of Massachusetts, Shorr, Andrew; Washington Hospital Center, Medicine                                                                                                           |
| <b>Primary Subject Heading</b>: | Infectious diseases                                                                                                                                                                                                                         |
| Secondary Subject Heading:      | Epidemiology, Health services research, Evidence based practice, Diagnostics                                                                                                                                                                |
| Keywords:                       | EPIDEMIOLOGY, Organisation of health services < HEALTH SERVICES ADMINISTRATION & MANAGEMENT, Diagnostic microbiology < INFECTIOUS DISEASES, Epidemiology < INFECTIOUS DISEASES, Adult intensive & critical care < INTENSIVE & CRITICAL CARE |
|                                 |                                                                                                                                                                                                                                             |

SCHOLARONE™  
Manuscripts

1  
2  
3 **Impact of prior probabilities of MRSA as an infectious agent on the accuracy of the**  
4 **emerging molecular diagnostic tests: A model simulation**  
5  
6

7 **Marya D. Zilberberg, MD, MPH<sup>\*1,2</sup>,**

8 <sup>1</sup>EviMed Research Group, LLC, Goshen, MA

9 <sup>2</sup>University of Massachusetts, Amherst, MA

10 \*Corresponding author

11 President & CEO, EviMed Research Group, LLC

12 Adjunct Associate Professor of Epidemiology, University of Massachusetts School of  
13 Public Health and Health Sciences

14 PO Box 303

15 Goshen, MA 01032

16 (413)-268-6381

17 (413)-268-3416 fax

18 [evimedgroup@gmail.com](mailto:evimedgroup@gmail.com)  
19  
20  
21

22 **Andrew F. Shorr, MD, MPH<sup>3</sup>**

23 <sup>3</sup>Washington Hospital Center, Washington, DC

24 Associate Section Director, Pulmonary Critical Care, Washington Hospital Center

25 Associate Professor of Medicine, Georgetown University

26 110 Irving Street, NW

27 Washington, DC 20010

28 (202)-877-2998

29 (202)-782-9032 fax

30 [Andrew.Shorr@gmail.com](mailto:Andrew.Shorr@gmail.com)  
31  
32  
33

34 **Copyright** © 2012 Marya Zilberberg

35 Dr. Zilberberg, the Corresponding Author, has the right to grant on behalf of all authors  
36 and does grant on behalf of all authors, an exclusive license on a worldwide basis to the  
37 BMJ Publishing Group Ltd to permit this article (if accepted) to be published in BMJ  
38 editions and any other BMJ PGL products and sublicenses such use and exploit all  
39 subsidiary rights, as set out in our license.  
40

41 **Competing interests:** The authors have nothing to disclose. The authors received no  
42 funding for this study. All authors have completed the Unified Competing Interest form.

43 **Guarantor statement:** Dr. Zilberberg has had access to all the data and guarantees its  
44 integrity.  
45

46 **IRB statement:** The study is a model and did not require an Ethics Committee review

47 **Author contributions:**

48 Dr. Zilberberg conceived, designed and executed the study, data collection and analyses,  
49 drafted the manuscript and revised it for important intellectual content.

50 Dr. Shorr refined the study idea, design and interpretation, and revised the manuscript for  
51 important intellectual content.  
52  
53  
54

55 **Word count:** 2,690

56 **References:** 19  
57  
58  
59  
60

1  
2  
3 **Tables and Figures: 4**  
4  
5  
6  
7  
8  
9  
10  
11  
12  
13  
14  
15  
16  
17  
18  
19  
20  
21  
22  
23  
24  
25  
26  
27  
28  
29  
30  
31  
32  
33  
34  
35  
36  
37  
38  
39  
40  
41  
42  
43  
44  
45  
46  
47  
48  
49  
50  
51  
52  
53  
54  
55  
56  
57  
58  
59  
60

For peer review only



## Abstract

**Objectives.** Traditional microbiology identification takes 48-72 hours to complete. This lag forces clinicians to rely on broad-spectrum empiric coverage. To address this gap, manufacturers are developing rapid molecular diagnostics (RMD). We hypothesized that RMD's accuracy is more dependent upon population risk of harboring the culprit pathogen than to their sensitivity and specificity.

**Design.** A mathematical model

**Setting and Participants.** We used the range of risks (5%-50%) for methicillin-resistant *Staphylococcus aureus* (MRSA) among patients hospitalized with complicated skin and skin structure infections (cSSSI), pneumonia, or sepsis.

**Main outcome measures.** We modeled the impact of changing a test's characteristics on its positive (PPV) and negative (NPV) predictive values, and hence the risk of over- or under-treatment, within strata of an organism's population prevalence. MRSA diagnostics provided assumptions for the test sensitivity and specificity (95%-99%). Scenarios with low sensitivity and specificity (90%), and best- and worst-case scenarios normalized to the annual universe of populations of interest, were examined.

**Results.** With a low prevalence (5%) and high test specificity, the PPV was 84%. Conversely, with 50% prevalence and 95% test specificity the PPV rose to  $\geq 95\%$ . Even when the test's specificity and sensitivity were both 90%, in a high-risk population both PPV and NPV were  $\sim 90\%$ . In the worst-case scenario, 150,000 patients with cSSSI, pneumonia and sepsis annually were at risk for inappropriate treatment, 91% of these at risk for over-treatment. In the best-case scenario, 81% of 18,000 patients at risk for inappropriate coverage were subject to over-treatment.

**Conclusions.** Although promising for limiting exposure to excessive antimicrobial coverage, RMDs alone will not solve the issue of inappropriate, and particularly over-, treatment. Increasing pre-test probability as a strategy to minimize antibiotic abuse results in more accurate patient classification than does developing a test with near-perfect characteristics. The healthcare community must build robust evidence and information technology infrastructure to guide appropriate use of such testing.

## Article summary

### *Article focus*

- Traditional microbiology identification takes 48-72 hours to complete, which forces clinicians to rely on broad-spectrum empiric coverage.
- To address this gap, manufacturers are developing rapid molecular diagnostics (RMD).
- It is unclear what impact RMDs may have in different population on overdiagnosis and overtreatment

### *Key messages*

- Although promising for limiting exposure to excessive antimicrobial coverage, RMDs alone will not solve the issue of inappropriate, and particularly over-, treatment.
- Increasing pre-test probability as a strategy to minimize antibiotic abuse results in more accurate patient classification than does developing a test with near-perfect sensitivity and specificity.

### *Strengths and limitations*

- As a mathematical model, our study relies on the accuracy of estimates in the literature, which predisposes our computations to greater uncertainty.
- The model is transparent.
- Our findings span a wide range of plausible epidemiology.
- The data underscore the need to understand local pathogen patterns, the recognition of which should drive decisions about the utility of these powerful molecular diagnostics.

## Introduction

Despite the fact that antibiotics represent a relatively recent advance in medicine, antibiotic resistant bacteria are now common in both the hospital and the community. Antibiotic misuse and abuse represent a key driver of the increasing prevalence in antibiotic resistance (1, 2). The spread of antimicrobial resistance has similarly created a vicious cycle where clinicians repeatedly reach for extended spectrum agents in order to address the current patterns of resistance while potentially worsening them for the future. Underlying this practice approach has been the general unavailability of reliable, rapid diagnostics to help establish the etiology of an infection. Indeed, traditional phenotypic microbiology methods take 48 to 72 hours to identify an organism when present and to determine the antibiotic susceptibility profile. Without a prompt means for either including or excluding potentially resistant pathogens, clinicians frequently have no alternative but to rely on broad-spectrum options for empiric therapy. Such approach is currently warranted, given the extensive data documenting that delayed and inappropriate antibiotic treatment increases the risk for mortality and prolongs the duration of hospitalization (3-9). However, rapid and accurate diagnosis should diminish the uncertainty and help target the culprit organisms without straying into the extremes of overly narrow or overly broad coverage.

To fill this diagnostic gap, several manufacturers are engaged in developing rapid diagnostic modalities that incorporate recent advances in molecular techniques relying on genotyping the organisms. Indeed, some of these technologies are able to arrive at the microbiologic diagnosis in as little as 2 hours, a critical period for tailoring treatment

1  
2  
3 (10). Such improvement in shortening the diagnostic time is invaluable, particularly  
4  
5 given these tests' ostensible accuracy.  
6  
7

8           At the same time, one must exercise caution because these tests are not 100%  
9 accurate. And while manufacturers strive for ever-increasing sensitivity and specificity  
10 for their tests, a more fruitful area of investigation may be learning to identify  
11 characteristics of specific populations in whom these tests may prove to be most helpful  
12 for targeting and tailoring treatment. In other words, the central clinical question may  
13 revolve not around issues of sensitivity and specificity intrinsic to the test, but rather  
14 around the positive (PPV) and negative (NPV) predictive values associated with these  
15 newer tools in populations with various levels of risk for the organisms in question. This  
16 approach fits in with the Bayesian decision making, whereby the prior probability of an  
17 event informs the interpretation of the diagnostic data. Irrespective of the sensitivity and  
18 specificity, if the PPV and NPV are not sufficiently high, then these new tests may not  
19 help clinicians either to withhold unnecessarily broad coverage or to tailor it shortly after  
20 the results return.  
21  
22  
23  
24  
25  
26  
27  
28  
29  
30  
31  
32  
33  
34  
35  
36  
37

38           We hypothesized that even under conditions where such rapid diagnostic tests had  
39 near-perfect sensitivity and specificity, the population-specific risk for having a particular  
40 organism would represent a crucial consideration in driving diagnostic accuracy. That is  
41 failure to consider the pre-test probability of these organisms in the population screened  
42 would undermine the potential value of rapid diagnostic tests. To address this question  
43 we developed a model simulation evaluating the application of these assays, and relied  
44 upon publicly available data to populate our analysis.  
45  
46  
47  
48  
49  
50  
51  
52  
53  
54

## 55 **Methods**

56  
57  
58  
59  
60

1  
2  
3 We developed a mathematical model simulating the impact of changing a test's  
4 characteristics on its accuracy within several strata of population risk for a particular  
5 organism. All the inputs were extracted from publicly available data. The primary  
6 outcome of interest was the potential magnitude for over-diagnosis of a particular  
7 pathogen, or the proportion of false positive tests under the varying assumptions. We  
8 were specifically interested in the false positive rates, since these cases are the ones most  
9 likely to receive overly broad treatment when it is not indicated. Such overly broad  
10 treatment represents a key clinical endpoint since it exposes the patient and the healthcare  
11 system to adverse consequences individually and as a group. As a secondary endpoint we  
12 examined the overall inaccuracy of the test in various scenarios, defined as the sum of the  
13 false positive and false negative results as a proportion of the total population.  
14  
15  
16  
17  
18  
19  
20  
21  
22  
23  
24  
25  
26  
27  
28

29 The model was based on the approximate risks of methicillin-resistant  
30 *Staphylococcus aureus* (MRSA) among three distinct hospitalized populations: 1)  
31 complicated skin and skin structure infections (cSSSI) (11-13), 2) pneumonia (11, 14),  
32 and 3) sepsis (11). We sought the most generalizable estimates for at least two factors out  
33 of the following three, using the available data to calculate the third when necessary: 1)  
34 total volume of hospitalizations for each disease of interest, 2) proportion of the total  
35 volume represented by MRSA, and 3) total number of MRSA infections in each disease  
36 category (11, 14, 15).  
37  
38  
39  
40  
41  
42  
43  
44  
45  
46  
47

48 For consistency, the assumptions for the corresponding test characteristics  
49 mimicked those from MRSA diagnostics (16). To derive estimates for positive (PPV) and  
50 negative predictive values (NPV) for a plausible range of test characteristics, we  
51 developed four hypothetical testing situations: 1) Test A, with the sensitivity and  
52  
53  
54  
55  
56  
57  
58  
59  
60

1  
2  
3 specificity of 95%, 2) Test B, with the sensitivity 99% and specificity 95%, 3) Test C,  
4  
5 with the sensitivity 95% and specificity 99%, and 4) Test D, with the sensitivity and  
6  
7 specificity 99%. To explore how deviations from the average sensitivity and specificity  
8  
9 metrics may impact the accuracy of identification, we conducted sensitivity analyses  
10  
11 assuming 90% sensitivity and specificity. Based on the range of MRSA risk estimates in  
12  
13 the populations of interest (i.e., cSSSI, pneumonia, and sepsis), we varied the prevalence  
14  
15 estimates from 5% to 50%, and calculated the PPV and NPV for each of the intermediate  
16  
17 values.  
18  
19  
20  
21

22 We additionally performed best- and worst-case scenario simulations for each  
23  
24 population in question. Thus, for the worst-case scenario where all variables were biased  
25  
26 against the novel rapid diagnostic assay, we utilized as inputs the highest disease volume  
27  
28 and lowest disease prevalence, along with the lowest test sensitivity and specificity  
29  
30 values. Skewing the inputs in this fashion provides a potential estimate of the extent and  
31  
32 impact of misclassification when all assumptions are shifted so as to constrain the  
33  
34 potential value of the rapid diagnostic test in question. Conversely, for the best-case  
35  
36 scenario, we input the lowest disease volume and the highest disease prevalence, along  
37  
38 with the highest test sensitivity and test specificity. For both of these analyses, the total  
39  
40 annual universe of specific disease hospitalizations in the US was used. We utilized these  
41  
42 values to estimate the total numbers of potential cases within each population that would  
43  
44 be over-treated (i.e., treated for MRSA when no MRSA is present), under-treated (i.e.,  
45  
46 not treated for MRSA when MRSA is present) and treated inappropriately (i.e., either  
47  
48 over- or undertreated).  
49  
50  
51  
52  
53  
54  
55  
56  
57  
58  
59  
60

1  
2  
3 Both the values for sensitivity and specificity and disease risk were rounded in  
4  
5 order to ease computational presentation. Volumes and prevalence of MRSA in the  
6  
7 disease states of interest were extracted from several large surveys available in the public  
8  
9 domain (Table 1). Thus, for the MRSA cSSSI volumes we relied on a study by Klein,  
10  
11 which quantified these hospitalizations in 2005 (11). The proportions of cSSSI in which  
12  
13 MRSA is the offending pathogen derived from two recent epidemiologic studies of cSSSI  
14  
15 hospitalizations in the US (12, 13). The volume of pneumonia hospitalizations was  
16  
17 extracted from the American Lung Association's 2010 data, and the proportion  
18  
19 represented by MRSA from a large and representative database analysis by Kollef and  
20  
21 colleagues (14, 15). Finally, we relied on the Agency's for Healthcare Research and  
22  
23 Quality recent statistical brief quantifying the burden of hospitalizations with sepsis,  
24  
25 while the Klein study provided the proportion likely caused by MRSA (11, 16).  
26  
27  
28  
29  
30  
31

## 32 **Results**

33  
34 The input assumptions and their sources are presented in Table 1. The estimated  
35  
36 prevalence of MRSA ranges from approximately 5% in sepsis to nearly 50% in cSSSI,  
37  
38 while the prevalence of MRSA in pneumonia falls between those extremes. Under the  
39  
40 conditions of lowest prevalence (5%) along with the average test specificity of 95%, the  
41  
42 PPV reaches only 50% (Figure 1). Improving the specificity by nearly 5% to 99%  
43  
44 without altering the disease prevalence results in a moderate improvement in the PPV to  
45  
46 approximately 84%. Alternatively, a change of a similar magnitude in the PPV occurs,  
47  
48 when the prevalence of disease increases from 5% to the 10%-20% range, even as the  
49  
50 specificity remains anchored at 95% (Figure 1). The PPV further improves as the  
51  
52 prevalence of disease approaches 50%. Notably, at the extremes of disease prevalence  
53  
54  
55  
56  
57  
58  
59  
60

1  
2  
3 and test specificity, the relative improvement in test accuracy is numerically greater when  
4  
5 the prevalence is increased while holding the specificity constant (PPV 95.0% and NPV  
6  
7 95.2% for Tests A and B, prevalence 50%) as compared to a scenario where one  
8  
9 modulates the test specificity and maintains the prevalence constant (PPV 83.3% and  
10  
11 NPV 83.9% for Tests C and D, prevalence 5%). Put another way, the net change in PPV  
12  
13 is maximized based on moderate changes in disease prevalence as opposed to alterations  
14  
15 in test sensitivity. As for the NPV, a rise in sensitivity from 95% to 99% does not yield  
16  
17 substantial alterations in the value. Essentially, the NPV is already quite high, no matter  
18  
19 what the prevalence of resistance in the population. Conversely, the NPV suffers only  
20  
21 modestly in the populations where disease prevalence is highest compared to those with  
22  
23 the lowest disease prevalence (Figure 1).  
24  
25  
26  
27  
28

29  
30 The sensitivity analysis in which we assume that both the sensitivity and  
31  
32 specificity of the test equal 90% is illustrated in Figure 2. At the lowest prevalence of  
33  
34 disease, this specificity affords an unacceptably low PPV (32.1%), while the NPV  
35  
36 remains high, exceeding 99%. As the prevalence of the disease rises in the target  
37  
38 population, while the test's specificity and sensitivity remain fixed at 90%, the PPV and  
39  
40 NPV converge at 90%, indicating a major improvement in the PPV without dramatically  
41  
42 compromising the NPV.  
43  
44  
45

46  
47 Best- and worst-case scenario estimates of the total annual pool of patients at risk  
48  
49 for MRSA infection in cSSSI, pneumonia and sepsis demonstrate that the potential for  
50  
51 over-treatment far exceeds that for under-treatment (Table 2). Focusing on sepsis as an  
52  
53 example, for the worst-case calculation we assumed 1,141,000 sepsis hospitalizations  
54  
55 annually, a 5% MRSA prevalence, along with test characteristics of 95% sensitivity and  
56  
57  
58  
59  
60



1  
2  
3 95% specificity. These parameters resulted in 57,050 potential cases of inappropriate  
4 treatment reflecting the sum of subjects classified as falsely positive or negative. Of  
5  
6 these misclassified subjects, 54,198 (95%) represent those at risk for over-treatment.  
7  
8  
9  
10 Conversely, under the best-case assumptions of a high MRSA prevalence (10%) in sepsis  
11  
12 (n=727,000), and a test with near-perfect sensitivity and specificity (both 99%), only  
13  
14 7,270 individuals are at risk for inappropriate treatment with 6,543 (90%) being over-  
15  
16 treated (Table 2).  
17  
18

19  
20 Overall, under the worst-case assumptions for all three of the conditions of  
21  
22 interest, over 150,000 patients annually with these three conditions may be treated  
23  
24 inappropriately, with overtreatment accounting for 136,000 (91%) of this cohort. Under  
25  
26 the best circumstances, among the more than 18,000 patients treated potentially  
27  
28 inappropriately, nearly 15,000 (81%) may be subjected to over-treatment (Table 2).  
29  
30

### 31 **Discussion**

32  
33  
34 We have demonstrated explicitly that organism prevalence is an important driver  
35  
36 of the accuracy of rapid molecular diagnostic tests even when their sensitivity and  
37  
38 specificity are near perfect. Additionally, we have shown that although improving the  
39  
40 theoretical test's specificity results in greater accuracy, one enhances accuracy even more  
41  
42 by restricting test utilization to a population at an increased risk for infection with the  
43  
44 pathogen in question. In other words, increasing pre-test probability as a strategy to  
45  
46 minimize antibiotic abuse results in more accurate patient classification than does  
47  
48 developing a marginally superior rapid diagnostic test with near-perfect specificity. In  
49  
50 fact, given the already high NPV, the new molecular diagnostics have the potential to  
51  
52 limit the use of empiric broad-spectrum coverage substantially. However, although  
53  
54  
55  
56  
57  
58  
59  
60

1  
2  
3 promising for limiting exposure to excessive antimicrobial coverage, molecular  
4  
5  
6 diagnostics are still likely to result in a substantial amount of inappropriate treatment. The  
7  
8 vast majority (over 90%) of such inappropriate coverage is due to over-treatment in  
9  
10 scenarios where the test is applied irrespective of considerations of the prevalence of a  
11  
12 resistant pathogen.  
13

14  
15 Our data have several important implications. First, as manufacturers, regulators  
16  
17 and clinicians consider what tests may have superior characteristics, it is important for all  
18  
19 stakeholders to engage in defining the appropriate populations for testing with these  
20  
21 novel technologies. Our data clearly demonstrate that rather than expending resources for  
22  
23 every laboratory to elevate their sensitivity and specificity to close to 100%, the more  
24  
25 fruitful effort may be to develop algorithms to identify those patient populations at high  
26  
27 risk for the disease being tested. This is particularly true given that marginal  
28  
29 enhancements in sensitivity and specificity often come at the cost of substantial financial  
30  
31 investments. Second, raising the sensitivity of these technologies even beyond the current  
32  
33 levels may be pursuing diminishing returns, given the already high NPV. That is, even  
34  
35 when the sensitivity is no higher than 90%, the negative predictive value reaches very  
36  
37 high levels (over 95%) in the setting of moderate pre-test probability for disease.  
38  
39  
40  
41  
42

43  
44 Third, and possibly most important, by using genotyping as opposed to  
45  
46 phenotyping employed in the traditional microbiology laboratory methods, molecular  
47  
48 diagnostics promise to result in sensitivity values that far exceed those of the traditional  
49  
50 techniques. The flip side of this optimization in sensitivity is a blunting in specificity,  
51  
52 whereby it may become unclear whether the identified organism is indeed the cause of  
53  
54  
55  
56  
57  
58  
59  
60

1  
2  
3 the clinical condition. Our data indicate that the true need in diagnostic testing lies not in  
4  
5 further optimization of sensitivity, but in improving the specificity of the results.  
6  
7

8 Because improvements in one by necessity lead to detriments in the other, future  
9  
10 directions in molecular diagnostics require thoughtful planning. We have clearly shown  
11  
12 that, in order to live up to the promise of improved targeting of antibiotic treatment, such  
13  
14 planning must include careful consideration of the populations in whom molecular  
15  
16 diagnostic techniques are appropriate. In fact the most important lesson from our  
17  
18 simulation is that we need to develop algorithms to help identify patients belonging to  
19  
20 populations with a high risk for the particular pathogen. If a predictive algorithm is able  
21  
22 to enrich the population to be tested to the disease prevalence between 30% and 40%,  
23  
24 both PPV and NPV will be moved into a useful range even when the test's sensitivity and  
25  
26 specificity are both well below 100%. With the advent of health informatics and the  
27  
28 massive growth in computing ability, turning reams of patient data into predictive  
29  
30 equations is a clearly needed functionality. Already several computing systems are  
31  
32 addressing this need, and the trend should continue with the input from all stakeholders  
33  
34  
35  
36  
37  
38  
39 (18, 19).

40  
41 Our study has a number of limitations. The most important limitation is that it is  
42  
43 merely a mathematical model, and, as such, by necessity relies on the accuracy of  
44  
45 estimates in the literature. The fact that some of the papers we used for deriving our  
46  
47 assumptions themselves were modeling exercises (11), predisposes our computations to  
48  
49 greater uncertainty. This, however, does not negate our findings that span a wide range of  
50  
51 plausible epidemiology. Furthermore, our model underscores the need to understand local  
52  
53  
54  
55  
56  
57  
58  
59  
60

1  
2  
3 pathogen patterns, the recognition of which should drive decisions about the utility of  
4  
5 these powerful molecular diagnostics.  
6  
7

8 In summary, molecular diagnostics promise to streamline identification and  
9  
10 treatment of many infectious diseases. While the emergence of these powerful  
11  
12 technologies is a positive development, we need to attend to developing algorithms to aid  
13  
14 in selecting appropriate patients for their use. Indiscriminate application of molecular  
15  
16 diagnostics to all-comers presenting with signs of an infection without consideration for  
17  
18 pre-test probability of disease is likely to result in a great deal of antimicrobial  
19  
20 overtreatment. This will then only accelerate the current trajectory of escalating  
21  
22 resistance. In conjunction with developing these important technologies, it is incumbent  
23  
24 upon the healthcare community to build robust evidence and information technology  
25  
26 infrastructure to guide appropriate use of such testing.  
27  
28  
29  
30  
31  
32  
33

34 **Acknowledgements.** No one other than the listed authors participated in the study. Dr.  
35  
36 Zilberberg had full access to all of the data in the study and takes responsibility for the  
37  
38 integrity of the data and the accuracy of the data analysis.  
39

40 Dr. Zilberberg participated in the conception and design of the study, data analysis and  
41  
42 interpretation and drafting and revising of the manuscript for important intellectual  
43  
44 content. Dr. Shorr participated in the conception of the study, data interpretation and  
45  
46 revising of the manuscript for important intellectual content.  
47  
48  
49  
50  
51  
52  
53  
54  
55  
56  
57  
58  
59  
60

## References

1. Dellit TH, Owens RC, McGowan JE, Jr., Gerding DN, Weinstein RA, Burke JP et al. Infectious Diseases Society of America and the Society for Healthcare Epidemiology of America guidelines for developing an institutional program to enhance antimicrobial stewardship. *Clin Infect Dis* 2007; 44(2):159-177
2. Spellberg B, Guidos R, Gilbert D, Bradley J, Boucher HW, Scheld WM et al. The epidemic of antibiotic-resistant infections: a call to action for the medical community from the Infectious Diseases Society of America. *Clin Infect Dis* 2008; 46(2):155-164
3. Micek ST, Kollef KE, Reichley RM, Roubinian N, Kollef MH. Health care-associated pneumonia and community-acquired pneumonia: a single-center experience. *Antimicrob Agents Chemother* 2007; 51(10):3568-3573
4. Schramm GE, Johnson JA, Doherty JA, Micek ST, Kollef MH. Methicillin-resistant *Staphylococcus aureus* sterile-site infection: The importance of appropriate initial antimicrobial treatment. *Crit Care Med* 2006; 34(8):2069-2074.
5. Ibrahim EH, Sherman G, Ward S, Fraser VJ, Kollef MH. The influence of inadequate antimicrobial treatment of bloodstream infections on patient outcomes in the ICU setting. *Chest* 2000; 118(1):146-155.
6. Alvarez-Lerma F. Modification of empiric antibiotic treatment in patients with pneumonia acquired in the intensive care unit. ICU-Acquired Pneumonia Study Group. *Intensive Care Med* 1996; 22(5):387-394.
7. Iregui M, Ward S, Sherman G, Fraser VJ, Kollef MH. Clinical importance of delays in the initiation of appropriate antibiotic treatment for ventilator-associated pneumonia. *Chest* 2002; 122(1):262-268.
8. Zilberberg MD, Shorr AF, Micek ST, Mody SH, Kollef MH. Antimicrobial therapy escalation and hospital mortality among patients with health-care-associated pneumonia: a single-center experience. *Chest* 2008; 134(5):963-968.
9. Zilberberg MD, Shorr AF, Micek ST, Chen J, Ramsey AM, Hoban AP et al. Hospitalizations with healthcare-associated complicated skin and skin structure infections: impact of inappropriate empiric therapy on outcomes. *J Hosp Med* 2010; 5(9):535-540.
10. Peterson LR, Liesenfeld O, Woods CW et al. Multicenter evaluation of the LightCycler methicillin-resistant *Staphylococcus aureus* (MRSA) advanced test as a rapid method for detection of MRSA in nasal surveillance swabs. *J Clin Microbiol* 2010;48:1661-6

11. Klein E, Smith DL, Laxminarayan R. Hospitalizations and deaths caused by methicillin-resistant *Staphylococcus aureus*, United States, 1999–2005. *Emerg Infect Dis* 2007;13:1840-6
12. Lipsky BA, Weigelt JA, Gupta V, Killian A, Peng MM. Skin, soft tissue, bone, and joint infections in hospitalized patients: epidemiology and microbiological, clinical, and economic outcomes. *Infect Control Hosp Epidemiol* 2007;28:1290-8
13. Jenkins TC, Sabel AL, Sarcone EE, et al. Skin and soft tissue infections requiring hospitalization at an academic medical center: Opportunities for antimicrobial stewardship. *Clin Infect Dis* 2010;51:895-903
14. Kollef MH, Shorr A, Tabak YP, et al. Epidemiology and outcomes of health-care-associated pneumonia: Results from a large US database of culture-positive pneumonia. *Chest* 2005;128:3854-3862
15. American Lung Association. Trends in Pneumonia and Influenza Morbidity and Mortality, 2010. Available at <http://www.lungusa.org/finding-cures/our-research/trend-reports/pi-trend-report.pdf>, accessed January 17, 2012
16. Hall MJ, Williams SN, DeFrances CJ, Golosinskiy A. Inpatient care for septicemia or sepsis: A challenge for patients and hospitals. NCHS data brief, no 62. Hyattsville, MD: National Center for Health Statistics. 2011. Available at <http://www.cdc.gov/nchs/data/databriefs/db62.pdf>, accessed February 1, 2012
17. BD molecular diagnostic solutions. BD GeneOhm Staph SR Assay package insert. Available at [http://www.bd.com/geneohm/english/products/pdfs/staphsr\\_pkginsert.pdf](http://www.bd.com/geneohm/english/products/pdfs/staphsr_pkginsert.pdf), accessed February 15, 2012
18. Pepitone J. IBM's 'Jeopardy' computer lands health care job. *CNNMoney* 2011 Sep 12, available at [http://money.cnn.com/2011/09/12/technology/ibm\\_watson\\_health\\_care/index.htm](http://money.cnn.com/2011/09/12/technology/ibm_watson_health_care/index.htm), accessed February 15, 2012
19. Terry K. Futuristic Clinical Decision Support Tool Catches On. *InformationWeek Healthcare* 2012 Jan 27, available at <http://informationweek.com/news/healthcare/clinical-systems/232500603>, accessed February 15, 2012

**Table 1. Annual hospitalization volumes**

| Infection type | Annual volume                   | MRSA prevalence (%)                     | MRSA volume                  |
|----------------|---------------------------------|-----------------------------------------|------------------------------|
| cSSSI          | 434,227-1,211,863               | 15.3% <sup>12</sup> -42.7 <sup>13</sup> | 185,415 <sup>11</sup>        |
| Pneumonia      | 651,000 <sup>15</sup>           | 5.6%-14.3% <sup>14</sup>                | 36,540 <sup>11</sup> -93,093 |
| Sepsis         | 727,000-1,141,000 <sup>16</sup> | 4.9%-7.7%                               | 56,246 <sup>11</sup>         |

MRSA=methicillin-resistant *Staphylococcus aureus*; cSSSI=complicated skin and skin structure infection

**Table 2. Best- and worst-case scenario simulations for each disease group**

|                            | Over-treated   | Under-treated | Treated inappropriately |
|----------------------------|----------------|---------------|-------------------------|
| <i>Best-case scenario</i>  |                |               |                         |
| cSSSI                      | 2,600          | 1,733         | 4,333                   |
| Pneumonia                  | 5,534          | 977           | 6,510                   |
| Sepsis                     | 6,543          | 727           | 7,270                   |
| <b>Total</b>               | <b>14,676</b>  | <b>3,437</b>  | <b>18,113</b>           |
| <i>Worst-case scenario</i> |                |               |                         |
| cSSSI                      | 51,389         | 9,069         | 60,458                  |
| Pneumonia                  | 30,923         | 1,628         | 32,550                  |
| Sepsis                     | 54,198         | 2,853         | 57,050                  |
| <b>Total</b>               | <b>136,509</b> | <b>13,549</b> | <b>150,058</b>          |

cSSSI=complicated skin and skin structure infection

1  
2  
3 **Figure 1. Positive and negative predictive values of a test with the given sensitivity**  
4 **and specificity, stratified by population disease prevalence\***  
5  
6  
7  
8

9 \*Percentages along the X-axis represent disease prevalence strata

10 PPV = positive predictive value; NPV = negative predictive value

11 Test A: sensitivity = 95%, specificity = 95%; Test B: sensitivity = 99%, specificity = 95%;

12 Test C: sensitivity = 95%, specificity = 99%; Test D: sensitivity = 99%, specificity = 99%

13  
14  
15  
16  
17  
18  
19  
20  
21  
22  
23  
24  
25  
26  
27  
28  
29  
30  
31  
32  
33  
34  
35  
36  
37  
38  
39  
40  
41  
42  
43  
44  
45  
46  
47  
48  
49  
50  
51  
52  
53  
54  
55  
56  
57  
58  
59  
60

For peer review only



1  
2  
3  
4  
5  
6  
7  
8  
9  
10  
11  
12  
13  
14  
15  
16  
17  
18  
19  
20  
21  
22  
23  
24  
25  
26  
27  
28  
29  
30  
31  
32  
33  
34  
35  
36  
37  
38  
39  
40  
41  
42  
43  
44  
45  
46  
47  
48  
49  
50  
51  
52  
53  
54  
55  
56  
57  
58  
59  
60

**Figure 2. Sensitivity analysis under the conditions of test sensitivity and specificity equaling 90%**

PPV = positive predictive value; NPV = negative predictive value

For peer review only

1  
2  
3 **Molecular diagnostics require a Bayesian approach****Impact of prior probabilities of**  
4 **MRSA as an infectious agent on the accuracy of the emerging molecular diagnostic**  
5 **tests: A model simulation**  
6  
7

8 **Marya D. Zilberberg, MD, MPH<sup>\*1,2</sup>,**

9 <sup>1</sup>EviMed Research Group, LLC, Goshen, MA

10 <sup>2</sup>University of Massachusetts, Amherst, MA

11 \*Corresponding author

12 President & CEO, EviMed Research Group, LLC

13 Adjunct Associate Professor of Epidemiology, University of Massachusetts School of  
14 Public Health and Health Sciences

15 PO Box 303

16 Goshen, MA 01032

17 (413)-268-6381

18 (413)-268-3416 fax

19 [evimedgroup@gmail.com](mailto:evimedgroup@gmail.com)  
20  
21  
22

23 **Andrew F. Shorr, MD, MPH<sup>3</sup>**

24 <sup>3</sup>Washington Hospital Center, Washington, DC

25 Associate Section Director, Pulmonary Critical Care, Washington Hospital Center

26 Associate Professor of Medicine, Georgetown University

27 110 Irving Street, NW

28 Washington, DC 20010

29 (202)-877-2998

30 (202)-782-9032 fax

31 [Andrew.Shorr@gmail.com](mailto:Andrew.Shorr@gmail.com)  
32  
33  
34

35 **Copyright** © 2012 Marya Zilberberg

36 Dr. Zilberberg, the Corresponding Author, has the right to grant on behalf of all authors  
37 and does grant on behalf of all authors, an exclusive license on a worldwide basis to the  
38 BMJ Publishing Group Ltd to permit this article (if accepted) to be published in BMJ  
39 editions and any other BMJ PGL products and sublicenses such use and exploit all  
40 subsidiary rights, as set out in our license.  
41

42 **Competing interests:** The authors have nothing to disclose. The authors received no  
43 funding for this study. All authors have completed the Unified Competing Interest form.

44 **Guarantor statement:** Dr. Zilberberg has had access to all the data and guarantees its  
45 integrity.  
46

47 **IRB statement:** The study is a model and did not require an Ethics Committee review

48 **Author contributions:**

49 Dr. Zilberberg conceived, designed and executed the study, data collection and analyses,  
50 drafted the manuscript and revised it for important intellectual content.

51 Dr. Shorr refined the study idea, design and interpretation, and revised the manuscript for  
52 important intellectual content.  
53  
54  
55

56 **Word count:** 2,690562  
57  
58  
59  
60

1  
2  
3  
4  
5  
6  
7  
8  
9  
10  
11  
12  
13  
14  
15  
16  
17  
18  
19  
20  
21  
22  
23  
24  
25  
26  
27  
28  
29  
30  
31  
32  
33  
34  
35  
36  
37  
38  
39  
40  
41  
42  
43  
44  
45  
46  
47  
48  
49  
50  
51  
52  
53  
54  
55  
56  
57  
58  
59  
60

**References: 19**  
**Tables and Figures: 4**

For peer review only

## Abstract

**Objectives.** Traditional microbiology identification takes 48-72 hours to complete. This lag forces clinicians to rely on broad-spectrum empiric coverage. To address this gap, manufacturers are developing rapid molecular diagnostics (RMD). We hypothesized that RMD's accuracy is more dependent upon population risk of harboring the culprit pathogen than to their sensitivity and specificity.

**Design.** A mathematical model

**Setting and Participants.** We used the range of risks (5%-50%) for methicillin-resistant *Staphylococcus aureus* (MRSA) among patients hospitalized with complicated skin and skin structure infections (cSSSI), pneumonia, or sepsis.

**Interventions.** None

**Main outcome measures.** We modeled the impact of changing a test's characteristics on its positive (PPV) and negative (NPV) predictive values, and hence the risk of over- or under-treatment, within strata of an organism's population prevalence. MRSA diagnostics provided assumptions for the test sensitivity and specificity (95%-99%). Scenarios with low sensitivity and specificity (90%), and best- and worst-case scenarios normalized to the annual universe of populations of interest, were examined.

**Results.** With a low prevalence (5%) and high test specificity, the PPV was 84%. Conversely, with 50% prevalence and 95% test specificity the PPV rose to  $\geq 95\%$ . Even when the test's specificity and sensitivity were both 90%, in a high-risk population both PPV and NPV were  $\sim 90\%$ . In the worst-case scenario, 150,000 patients with cSSSI, pneumonia and sepsis annually were at risk for inappropriate treatment, 91% of these at risk for over-treatment. In the best-case scenario, 81% of 18,000 patients at risk for inappropriate coverage were subject to over-treatment.

**Conclusions.** Although promising for limiting exposure to excessive antimicrobial coverage, RMDs alone will not solve the issue of inappropriate, and particularly over-, treatment. Increasing pre-test probability as a strategy to minimize antibiotic abuse results in more accurate patient classification than does developing a test with near-perfect characteristics. The healthcare community must build robust evidence and information technology infrastructure to guide appropriate use of such testing.

## Article summary

### *Article focus*

- Traditional microbiology identification takes 48-72 hours to complete, which forces clinicians to rely on broad-spectrum empiric coverage.
- To address this gap, manufacturers are developing rapid molecular diagnostics (RMD).
- It is unclear what impact RMDs may have in different population on overdiagnosis and overtreatment

### *Key messages*

- Although promising for limiting exposure to excessive antimicrobial coverage, RMDs alone will not solve the issue of inappropriate, and particularly over-, treatment.
- Increasing pre-test probability as a strategy to minimize antibiotic abuse results in more accurate patient classification than does developing a test with near-perfect sensitivity and specificity.

### *Strengths and limitations*

- As a mathematical model, our study relies on the accuracy of estimates in the literature, which predisposes our computations to greater uncertainty.
- The model is transparent.
- Our findings span a wide range of plausible epidemiology.
- The data underscore the need to understand local pathogen patterns, the recognition of which should drive decisions about the utility of these powerful molecular diagnostics.

## Introduction

Despite the fact that antibiotics represent a relatively recent advance in medicine, antibiotic resistant bacteria are now common in both the hospital and the community. Antibiotic misuse and abuse represent a key driver of the increasing prevalence in antibiotic resistance (1, 2). The spread of antimicrobial resistance has similarly created a vicious cycle where clinicians repeatedly reach for extended spectrum agents in order to address the current patterns of resistance while potentially worsening them for the future. Underlying this practice approach has been the general unavailability of reliable, rapid diagnostics to help establish the etiology of an infection. Indeed, traditional phenotypic microbiology methods take 48 to 72 hours to identify an organism when present and to determine the antibiotic susceptibility profile. Without a prompt means for either including or excluding potentially resistant pathogens, clinicians frequently have no alternative but to rely on broad-spectrum options for empiric therapy. Such approach is currently warranted, given the extensive data documenting that delayed and inappropriate antibiotic treatment increases the risk for mortality and prolongs the duration of hospitalization (3-9). However, rapid and accurate diagnosis should diminish the uncertainty and help target the culprit organisms without straying into the extremes of overly narrow or overly broad coverage.

To fill this diagnostic gap, several manufacturers are engaged in developing rapid diagnostic modalities that incorporate recent advances in molecular techniques relying on genotyping the organisms. Indeed, some of these technologies are able to arrive at the microbiologic diagnosis in as little as 2 hours, a critical period for tailoring treatment

1  
2  
3 (10). Such improvement in shortening the diagnostic time is invaluable, particularly  
4  
5 given these tests' ostensible accuracy.  
6  
7

8 At the same time, one must exercise caution because these tests are not 100%  
9  
10 accurate. And while manufacturers strive for ever-increasing sensitivity and specificity  
11  
12 for their tests, a more fruitful area of investigation may be learning to identify  
13  
14 characteristics of specific populations in whom these tests may prove to be most helpful  
15  
16 for targeting and tailoring treatment. In other words, the central clinical question may  
17  
18 revolve not around issues of sensitivity and specificity intrinsic to the test, but rather  
19  
20 around the positive (PPV) and negative (NPV) predictive values associated with these  
21  
22 newer tools in populations with various levels of risk for the organisms in question. This  
23  
24 approach fits in with the Bayesian decision making, whereby the prior probability of an  
25  
26 event informs the interpretation of the diagnostic data. Irrespective of the sensitivity and  
27  
28 specificity, if the PPV and NPV are not sufficiently high, then these new tests may not  
29  
30 help clinicians either to withhold unnecessarily broad coverage or to tailor it shortly after  
31  
32 the results return.  
33  
34  
35  
36  
37

38 We hypothesized that even under conditions where such rapid diagnostic tests had  
39  
40 near-perfect sensitivity and specificity, the population-specific risk for having a particular  
41  
42 organism would represent a crucial consideration in driving diagnostic accuracy. That is  
43  
44 failure to consider the pre-test probability of these organisms in the population screened  
45  
46 would undermine the potential value of rapid diagnostic tests. To address this question  
47  
48 we developed a model simulation evaluating the application of these assays, and relied  
49  
50 upon publicly available data to populate our analysis.  
51  
52  
53  
54

## 55 **Methods**

56  
57  
58  
59  
60

1  
2  
3  
4 We developed a mathematical model simulating the impact of changing a test's  
5 characteristics on its accuracy within several strata of population risk for a particular  
6 organism. All the inputs were extracted from publicly available data. The primary  
7 outcome of interest was the potential magnitude for over-diagnosis of a particular  
8 pathogen, or the proportion of false positive tests under the varying assumptions. We  
9 were specifically interested in the false positive rates, since these cases are the ones most  
10 likely to receive overly broad treatment when it is not indicated. Such overly broad  
11 treatment represents a key clinical endpoint since it exposes the patient and the healthcare  
12 system to adverse consequences individually and as a group. As a secondary endpoint we  
13 examined the overall inaccuracy of the test in various scenarios, defined as the sum of the  
14 false positive and false negative results as a proportion of the total population.  
15  
16  
17  
18  
19  
20  
21  
22  
23  
24  
25  
26  
27  
28

29 The model was based on the approximate risks of methicillin-resistant  
30 *Staphylococcus aureus* (MRSA) among three distinct hospitalized populations: 1)  
31 complicated skin and skin structure infections (cSSSI) (11-13), 2) pneumonia (11, 14),  
32 and 3) sepsis (11). We sought the most generalizable estimates for at least two factors out  
33 of the following three, using the available data to calculate the third when necessary: 1)  
34 total volume of hospitalizations for each ~~of the~~ diseases of interest, 2) proportion of the  
35 total volume represented by MRSA, and 3) total number of MRSA infections in each  
36 disease category (11, 14, 15).  
37  
38  
39  
40  
41  
42  
43  
44  
45  
46  
47

48 For consistency, the assumptions for the corresponding test characteristics  
49 mimicked those from MRSA diagnostics (16). To derive estimates for positive (PPV) and  
50 negative predictive values (NPV) for a plausible range of test characteristics, we  
51 developed four hypothetical testing situations: 1) Test A, with the sensitivity and  
52  
53  
54  
55  
56  
57  
58  
59  
60



1  
2  
3 specificity of 95%, 2) Test B, with the sensitivity 99% and specificity 95%, 3) Test C,  
4  
5 with the sensitivity 95% and specificity 99%, and 4) Test D, with the sensitivity and  
6  
7 specificity 99%. To explore how deviations from the average sensitivity and specificity  
8  
9 metrics may impact the accuracy of identification, we conducted sensitivity analyses  
10  
11 assuming 90% sensitivity and specificity. Based on the range of MRSA risk estimates in  
12  
13 the populations of interest (i.e., cSSSI, pneumonia, and sepsis), we varied the prevalence  
14  
15 estimates from 5% to 50%, and calculated the PPV and NPV for each of the intermediate  
16  
17 values.  
18  
19  
20  
21

22 We additionally performed best- and worst-case scenario simulations for each of  
23  
24 the populations in question. Thus, for the worst-case scenario where all variables were  
25  
26 biased against the novel rapid diagnostic assay, we utilized as inputs the highest disease  
27  
28 volume and lowest disease prevalence, along with the lowest test sensitivity and  
29  
30 specificity values. Skewing the inputs in this fashion provides a potential estimate of the  
31  
32 extent and impact of misclassification when all assumptions are shifted so as to constrain  
33  
34 the potential value of the rapid diagnostic test in question. Conversely, for the best-case  
35  
36 scenario, we input the lowest disease volume and the highest disease prevalence, along  
37  
38 with the highest test sensitivity and test specificity. For both of these analyses, the total  
39  
40 annual universe of specific disease hospitalizations in the US was used. We utilized these  
41  
42 values to estimate the total numbers of potential cases within each population that would  
43  
44 be over-treated (i.e., treated for MRSA when no MRSA is present), under-treated (i.e.,  
45  
46 not treated for MRSA when MRSA is present) and treated inappropriately (i.e., either  
47  
48 over- or undertreated).  
49  
50  
51  
52  
53  
54  
55  
56  
57  
58  
59  
60

1  
2  
3 Both the values for sensitivity and specificity and disease risk were rounded in  
4  
5 order to ease computational presentation. Volumes and prevalence of MRSA in the  
6  
7 disease states of interest were extracted from several large surveys available in the public  
8  
9 domain (Table 1). Thus, for the MRSA cSSSI volumes we relied on a study by Klein,  
10  
11 which quantified these hospitalizations in 2005 (11). The proportions of cSSSI in which  
12  
13 MRSA is the offending pathogen derived from two recent epidemiologic studies of cSSSI  
14  
15 hospitalizations in the US (12, 13). The volume of pneumonia hospitalizations was  
16  
17 extracted from the American Lung Association's 2010 data, and the proportion  
18  
19 represented by MRSA from a large and representative database analysis by Kollef and  
20  
21 colleagues (14, 15). Finally, we relied on the Agency's for Healthcare Research and  
22  
23 Quality recent statistical brief quantifying the burden of hospitalizations with sepsis,  
24  
25 while the Klein study provided the proportion likely caused by MRSA (11, 16).  
26  
27  
28  
29  
30  
31

## 32 **Results**

33  
34 The input assumptions and their sources are presented in Table 1. The estimated  
35  
36 prevalence of MRSA ranges from approximately 5% in sepsis to nearly 50% in cSSSI,  
37  
38 while the prevalence of MRSA in pneumonia falls between those extremes. Under the  
39  
40 conditions of lowest prevalence (5%) along with the average test specificity of 95%, the  
41  
42 PPV reaches only 50% (Figure 1). Improving the specificity by nearly 5% to 99%  
43  
44 without altering the disease prevalence results in a moderate improvement in the PPV to  
45  
46 approximately 84%. Alternatively, a change of a similar magnitude in the PPV occurs,  
47  
48 when the prevalence of disease increases from 5% to the 10%-20% range, even as the  
49  
50 specificity remains anchored at 95% (Figure 1). The PPV further improves as the  
51  
52 prevalence of disease approaches 50%. Notably, at the extremes of disease prevalence  
53  
54  
55  
56  
57  
58  
59  
60

1  
2  
3 and test specificity, the relative improvement in test accuracy is numerically greater when  
4  
5 the prevalence is increased while holding the specificity constant (PPV 95.0% and NPV  
6  
7 95.2% for Tests A and B, prevalence 50%) as compared to a scenario where one  
8  
9 modulates the test specificity and maintains the prevalence constant (PPV 83.3% and  
10  
11 NPV 83.9% for Tests C and D, prevalence 5%). Put another way, the net change in PPV  
12  
13 is maximized based on moderate changes in disease prevalence as opposed to alterations  
14  
15 in test sensitivity. As for the NPV, a rise in sensitivity from 95% to 99% does not yield  
16  
17 substantial alterations in the value. Essentially, the NPV is already quite high, no matter  
18  
19 what the prevalence of resistance in the population. Conversely, the NPV suffers only  
20  
21 modestly in the populations where disease prevalence is highest compared to those with  
22  
23 the lowest disease prevalence (Figure 1).  
24  
25  
26  
27  
28

29 The sensitivity analysis in which we assume that both the sensitivity and  
30  
31 specificity of the test equal 90% is illustrated in Figure 2. At the lowest prevalence of  
32  
33 disease, this specificity affords an unacceptably low PPV (32.1%), while the NPV  
34  
35 remains high, exceeding 99%. As the prevalence of the disease rises in the target  
36  
37 population, while the test's specificity and sensitivity remain fixed at 90%, the PPV and  
38  
39 NPV converge at 90%, indicating a major improvement in the PPV without dramatically  
40  
41 compromising the NPV.  
42  
43  
44  
45

46 Best- and worst-case scenario estimates of the total annual pool of patients at risk  
47  
48 for MRSA infection in cSSSI, pneumonia and sepsis demonstrate that the potential for  
49  
50 over-treatment far exceeds that for under-treatment (Table 2). Focusing on sepsis as an  
51  
52 example, for the worst-case calculation we assumed 1,141,000 sepsis hospitalizations  
53  
54 annually, a 5% MRSA prevalence, along with test characteristics of 95% sensitivity and  
55  
56  
57  
58  
59  
60

1  
2  
3 95% specificity. These parameters resulted in 57,050 potential cases of inappropriate  
4 treatment reflecting the sum of subjects classified as falsely positive or negative. Of  
5  
6 these misclassified subjects, 54,198 (95%) represent those at risk for over-treatment.  
7  
8  
9  
10 Conversely, under the best-case assumptions of a high MRSA prevalence (10%) in sepsis  
11  
12 (n=727,000), and a test with near-perfect sensitivity and specificity (both 99%), only  
13  
14 7,270 individuals are at risk for inappropriate treatment with 6,543 (90%) being over-  
15  
16 treated (Table 2).  
17  
18

19  
20 Overall, under the worst-case assumptions for all three of the conditions of  
21  
22 interest, over 150,000 patients annually with these three conditions may be treated  
23  
24 inappropriately, with overtreatment accounting for 136,000 (91%) of this cohort. Under  
25  
26 the best circumstances, among the more than 18,000 patients treated potentially  
27  
28 inappropriately, nearly 15,000 (81%) may be subjected to over-treatment (Table 2).  
29  
30

### 31 Discussion

32  
33  
34 We have demonstrated explicitly that organism prevalence is an important driver  
35  
36 of the accuracy of rapid molecular diagnostic tests even when their sensitivity and  
37  
38 specificity are near perfect. Additionally, we have shown that although improving the  
39  
40 theoretical test's specificity results in greater accuracy, one enhances accuracy even more  
41  
42 by restricting test utilization to a population at an increased risk for infection with the  
43  
44 pathogen in question. In other words, increasing pre-test probability as a strategy to  
45  
46 minimize antibiotic abuse results in more accurate patient classification than does  
47  
48 developing a marginally superior rapid diagnostic test with near-perfect specificity. In  
49  
50 fact, given the already high NPV, the new molecular diagnostics have the potential to  
51  
52 limit the use of empiric broad-spectrum coverage substantially. Finally However,  
53  
54  
55  
56  
57  
58  
59  
60

1  
2  
3 although promising for limiting exposure to excessive antimicrobial coverage, molecular  
4  
5  
6 diagnostics are still likely to result in a substantial amount of inappropriate treatment. The  
7  
8  
9 vast majority (over 90%) of such inappropriate coverage is due to over-treatment in  
10  
11 scenarios where the test is applied irrespective of considerations of the prevalence of a  
12  
13 resistant pathogen.

14  
15 Our data have several important implications. First, as manufacturers, regulators  
16  
17 and clinicians consider what tests may have superior characteristics, it is important for all  
18  
19  
20 stake-holders to engage in defining the appropriate populations for testing with these  
21  
22 novel technologies. Our data clearly demonstrate that rather than expending resources for  
23  
24 every laboratory to elevate their sensitivity and specificity to close to 100%, the more  
25  
26 fruitful effort may be to develop algorithms to identify those patient populations at high  
27  
28 risk for the disease being tested. This is particularly true given that marginal  
29  
30  
31 enhancements in sensitivity and specificity often come at the cost of substantial financial  
32  
33 investments. Second, raising the sensitivity of these technologies even beyond the current  
34  
35 levels may be pursuing diminishing returns, given the already high NPV. That is, even  
36  
37 when the sensitivity is no higher than 90%, the negative predictive value reaches very  
38  
39 high levels (over 95%) in the setting of moderate pre-test probability for disease.  
40  
41  
42

43  
44 Third, and possibly most important, by using genotyping as opposed to  
45  
46 phenotyping employed in the traditional microbiology laboratory methods, molecular  
47  
48 diagnostics promise to result in sensitivity values that far exceed those of the traditional  
49  
50 techniques. The flip side of this optimization in sensitivity is a blunting in specificity,  
51  
52 whereby it may become unclear whether the identified organism is indeed the cause of  
53  
54  
55  
56  
57  
58  
59  
60

1  
2  
3 the clinical condition. Our data indicate that the true need in diagnostic testing lies not in  
4 further optimization of sensitivity, but in improving the specificity of the results.  
5  
6

7  
8 Because improvements in one by necessity lead to detriments in the other, future  
9 directions in molecular diagnostics require thoughtful planning. We have clearly shown  
10 that, in order to live up to the promise of improved targeting of antibiotic treatment, such  
11 planning must include careful consideration of the populations in whom molecular  
12 diagnostic techniques are appropriate. In fact the most important lesson from our  
13 simulation is that we need to develop algorithms to help identify patients belonging to  
14 populations with a high risk for the particular pathogen. If a predictive algorithm is able  
15 to enrich the population to be tested to the disease prevalence between 30% and 40%,  
16 both PPV and NPV will be moved into a useful range even when the test's sensitivity and  
17 specificity are both well below 100%. With the advent of health informatics and the  
18 massive growth in computing ability, turning reams of patient data into predictive  
19 equations is a clearly needed functionality. Already several computing systems are  
20 addressing this need, and the trend should continue with the input from all stakeholders  
21 (18, 19).  
22  
23  
24  
25  
26  
27  
28  
29  
30  
31  
32  
33  
34  
35  
36  
37  
38  
39

40 Our study has a number of limitations. The most important limitation is that it is  
41 merely a mathematical model, and, as such, by necessity relies on the accuracy of  
42 estimates in the literature. The fact that some of the papers we used for deriving our  
43 assumptions themselves were modeling exercises (11), predisposes our computations to  
44 greater uncertainty. This, however, does not negate our findings that span a wide range of  
45 plausible epidemiology. Furthermore, our model underscores the need to understand local  
46  
47  
48  
49  
50  
51  
52  
53  
54  
55  
56  
57  
58  
59  
60

1  
2  
3 pathogen patterns, the recognition of which should drive decisions about the utility of  
4  
5 these powerful molecular diagnostics.  
6  
7

8 In summary, molecular diagnostics promise to streamline identification and  
9  
10 treatment of many infectious diseases. While the emergence of these powerful  
11  
12 technologies is a positive development, we need to attend to developing algorithms to aid  
13  
14 in selecting appropriate patients for their use. Indiscriminate application of molecular  
15  
16 diagnostics to all-comers presenting with signs of an infection without consideration for  
17  
18 pre-test probability of disease is likely to result in a great deal of antimicrobial  
19  
20 overtreatment. This will then only accelerate the current trajectory of escalating  
21  
22 resistance. In conjunction with developing these important technologies, it is incumbent  
23  
24 upon the healthcare community to build robust evidence and information technology  
25  
26 infrastructure to guide appropriate use of such testing.  
27  
28  
29  
30  
31  
32  
33

34 **Acknowledgements.** No one other than the listed authors participated in the study. Dr.  
35  
36 Zilberberg had full access to all of the data in the study and takes responsibility for the  
37  
38 integrity of the data and the accuracy of the data analysis.  
39

40 Dr. Zilberberg participated in the conception and design of the study, data analysis and  
41  
42 interpretation and drafting and revising of the manuscript for important intellectual  
43  
44 content. Dr. Shorr participated in the conception of the study, data interpretation and  
45  
46 revising of the manuscript for important intellectual content.  
47  
48  
49  
50  
51  
52  
53  
54  
55  
56  
57  
58  
59  
60

## References

1. Dellit TH, Owens RC, McGowan JE, Jr., Gerding DN, Weinstein RA, Burke JP et al. Infectious Diseases Society of America and the Society for Healthcare Epidemiology of America guidelines for developing an institutional program to enhance antimicrobial stewardship. *Clin Infect Dis* 2007; 44(2):159-177
2. Spellberg B, Guidos R, Gilbert D, Bradley J, Boucher HW, Scheld WM et al. The epidemic of antibiotic-resistant infections: a call to action for the medical community from the Infectious Diseases Society of America. *Clin Infect Dis* 2008; 46(2):155-164
3. Micek ST, Kollef KE, Reichley RM, Roubinian N, Kollef MH. Health care-associated pneumonia and community-acquired pneumonia: a single-center experience. *Antimicrob Agents Chemother* 2007; 51(10):3568-3573
4. Schramm GE, Johnson JA, Doherty JA, Micek ST, Kollef MH. Methicillin-resistant *Staphylococcus aureus* sterile-site infection: The importance of appropriate initial antimicrobial treatment. *Crit Care Med* 2006; 34(8):2069-2074.
5. Ibrahim EH, Sherman G, Ward S, Fraser VJ, Kollef MH. The influence of inadequate antimicrobial treatment of bloodstream infections on patient outcomes in the ICU setting. *Chest* 2000; 118(1):146-155.
6. Alvarez-Lerma F. Modification of empiric antibiotic treatment in patients with pneumonia acquired in the intensive care unit. ICU-Acquired Pneumonia Study Group. *Intensive Care Med* 1996; 22(5):387-394.
7. Iregui M, Ward S, Sherman G, Fraser VJ, Kollef MH. Clinical importance of delays in the initiation of appropriate antibiotic treatment for ventilator-associated pneumonia. *Chest* 2002; 122(1):262-268.
8. Zilberberg MD, Shorr AF, Micek ST, Mody SH, Kollef MH. Antimicrobial therapy escalation and hospital mortality among patients with health-care-associated pneumonia: a single-center experience. *Chest* 2008; 134(5):963-968.
9. Zilberberg MD, Shorr AF, Micek ST, Chen J, Ramsey AM, Hoban AP et al. Hospitalizations with healthcare-associated complicated skin and skin structure infections: impact of inappropriate empiric therapy on outcomes. *J Hosp Med* 2010; 5(9):535-540.
10. Peterson LR, Liesenfeld O, Woods CW et al. Multicenter evaluation of the LightCycler methicillin-resistant *Staphylococcus aureus* (MRSA) advanced test as a rapid method for detection of MRSA in nasal surveillance swabs. *J Clin Microbiol* 2010;48:1661-6



11. Klein E, Smith DL, Laxminarayan R. Hospitalizations and deaths caused by methicillin-resistant *Staphylococcus aureus*, United States, 1999–2005. *Emerg Infect Dis* 2007;13:1840-6
12. Lipsky BA, Weigelt JA, Gupta V, Killian A, Peng MM. Skin, soft tissue, bone, and joint infections in hospitalized patients: epidemiology and microbiological, clinical, and economic outcomes. *Infect Control Hosp Epidemiol* 2007;28:1290-8
13. Jenkins TC, Sabel AL, Sarcone EE, et al. Skin and soft tissue infections requiring hospitalization at an academic medical center: Opportunities for antimicrobial stewardship. *Clin Infect Dis* 2010;51:895-903
14. Kollef MH, Shorr A, Tabak YP, et al. Epidemiology and outcomes of health-care-associated pneumonia: Results from a large US database of culture-positive pneumonia. *Chest* 2005;128:3854-3862
15. American Lung Association. Trends in Pneumonia and Influenza Morbidity and Mortality, 2010. Available at <http://www.lungusa.org/finding-cures/our-research/trend-reports/pi-trend-report.pdf>, accessed January 17, 2012
16. Hall MJ, Williams SN, DeFrances CJ, Golosinskiy A. Inpatient care for septicemia or sepsis: A challenge for patients and hospitals. NCHS data brief, no 62. Hyattsville, MD: National Center for Health Statistics. 2011. Available at <http://www.cdc.gov/nchs/data/databriefs/db62.pdf>, accessed February 1, 2012
17. BD molecular diagnostic solutions. BD GeneOhm Staph SR Assay package insert. Available at [http://www.bd.com/geneohm/english/products/pdfs/staphsr\\_pkginsert.pdf](http://www.bd.com/geneohm/english/products/pdfs/staphsr_pkginsert.pdf), accessed February 15, 2012
18. Pepitone J. IBM's 'Jeopardy' computer lands health care job. *CNNMoney* 2011 Sep 12, available at [http://money.cnn.com/2011/09/12/technology/ibm\\_watson\\_health\\_care/index.htm](http://money.cnn.com/2011/09/12/technology/ibm_watson_health_care/index.htm), accessed February 15, 2012
19. Terry K. Futuristic Clinical Decision Support Tool Catches On. *InformationWeek Healthcare* 2012 Jan 27, available at <http://informationweek.com/news/healthcare/clinical-systems/232500603>, accessed February 15, 2012

**Table 1. Annual hospitalization volumes**

| Infection type | Annual volume                   | MRSA prevalence (%)                     | MRSA volume                  |
|----------------|---------------------------------|-----------------------------------------|------------------------------|
| cSSSI          | 434,227-1,211,863               | 15.3% <sup>12</sup> -42.7 <sup>13</sup> | 185,415 <sup>11</sup>        |
| Pneumonia      | 651,000 <sup>15</sup>           | 5.6%-14.3% <sup>14</sup>                | 36,540 <sup>11</sup> -93,093 |
| Sepsis         | 727,000-1,141,000 <sup>16</sup> | 4.9%-7.7%                               | 56,246 <sup>11</sup>         |

MRSA=methicillin-resistant *Staphylococcus aureus*; cSSSI=complicated skin and skin structure infection

**Table 2. Best- and worst-case scenario simulations for each disease group**

|                            | Over-treated   | Under-treated | Treated inappropriately |
|----------------------------|----------------|---------------|-------------------------|
| <i>Best-case scenario</i>  |                |               |                         |
| cSSSI                      | 2,600          | 1,733         | 4,333                   |
| Pneumonia                  | 5,534          | 977           | 6,510                   |
| Sepsis                     | 6,543          | 727           | 7,270                   |
| <b>Total</b>               | <b>14,676</b>  | <b>3,437</b>  | <b>18,113</b>           |
| <i>Worst-case scenario</i> |                |               |                         |
| cSSSI                      | 51,389         | 9,069         | 60,458                  |
| Pneumonia                  | 30,923         | 1,628         | 32,550                  |
| Sepsis                     | 54,198         | 2,853         | 57,050                  |
| <b>Total</b>               | <b>136,509</b> | <b>13,549</b> | <b>150,058</b>          |

cSSSI=complicated skin and skin structure infection

**Figure 1. Positive and negative predictive values of a test with the given sensitivity and specificity, stratified by population disease prevalence\***

\*Percentages along the X-axis represent disease prevalence strata  
PPV = positive predictive value; NPV = negative predictive value  
Test A: sensitivity = 95%, specificity = 95%; Test B: sensitivity = 99%, specificity = 95%;  
Test C: sensitivity = 95%, specificity = 99%; Test D: sensitivity = 99%, specificity = 99%

For peer review only

1  
2  
3  
4  
5  
6  
7  
8  
9  
10  
11  
12  
13  
14  
15  
16  
17  
18  
19  
20  
21  
22  
23  
24  
25  
26  
27  
28  
29  
30  
31  
32  
33  
34  
35  
36  
37  
38  
39  
40  
41  
42  
43  
44  
45  
46  
47  
48  
49  
50  
51  
52  
53  
54  
55  
56  
57  
58  
59  
60

1  
2  
3 **Figure 2. Sensitivity analysis under the conditions of test sensitivity and specificity**  
4 **equaling 90%**  
5  
6  
7

8 PPV = positive predictive value; NPV = negative predictive value  
9  
10  
11  
12  
13  
14  
15  
16  
17  
18  
19  
20  
21  
22  
23  
24  
25  
26  
27  
28  
29  
30  
31  
32  
33  
34  
35  
36  
37  
38  
39  
40  
41  
42  
43  
44  
45  
46  
47  
48  
49  
50  
51  
52  
53  
54  
55  
56  
57  
58  
59  
60

For peer review only

1  
2  
3  
4  
5  
6  
7  
8  
9  
10  
11  
12  
13  
14  
15  
16  
17  
18  
19  
20  
21  
22  
23  
24  
25  
26  
27  
28  
29  
30  
31  
32  
33  
34  
35  
36  
37  
38  
39  
40  
41  
42  
43  
44  
45  
46  
47  
48  
49  
50  
51  
52  
53  
54  
55  
56  
57  
58  
59  
60

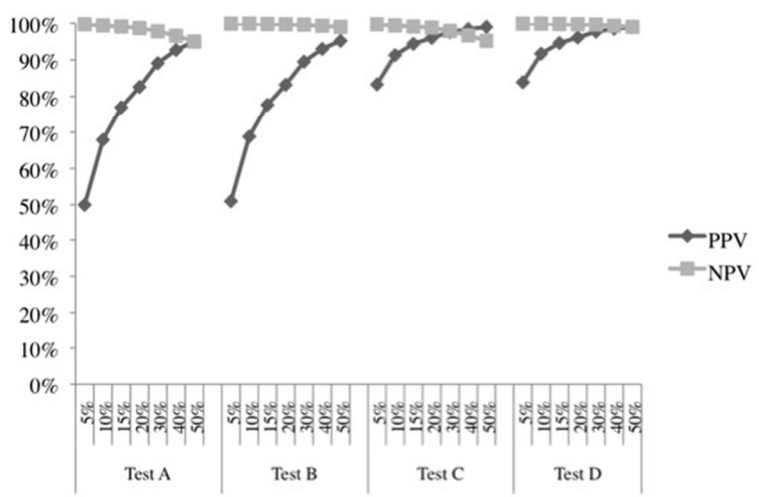

119x90mm (300 x 300 DPI)

Review only

1  
2  
3  
4  
5  
6  
7  
8  
9  
10  
11  
12  
13  
14  
15  
16  
17  
18  
19  
20  
21  
22  
23  
24  
25  
26  
27  
28  
29  
30  
31  
32  
33  
34  
35  
36  
37  
38  
39  
40  
41  
42  
43  
44  
45  
46  
47  
48  
49  
50  
51  
52  
53  
54  
55  
56  
57  
58  
59  
60

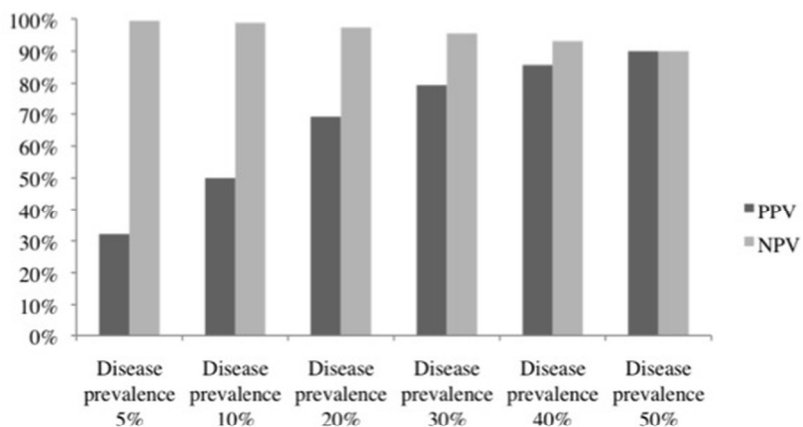

119x90mm (300 x 300 DPI)

Review only
